# Supplementary material
Source: MDPI journal article supplement (https://www.mdpi.com/1099-4300/24/4/556)
Supplement: s1 [file s1]

**Table S1.** Entropy ~ State+(1|subject) , 780 nm optical density data statistical results.

| CH | Parameter | Fixed effect |         |        |         | Estimated intercept | Random effect |         |        | Error  |         |        |
|----|-----------|--------------|---------|--------|---------|---------------------|---------------|---------|--------|--------|---------|--------|
|    |           | Effect size  | CI(95%) |        | p-value |                     | SD            | CI(95%) |        | SD     | CI(95%) |        |
|    |           |              | Lower   | Upper  |         |                     |               | Lower   | Upper  |        | Lower   | Upper  |
| 1  | State     | -0.0015      | -0.0038 | 0.0007 | 0.1818  | 0.0411              | 0.0100        | 0.0073  | 0.0137 | 0.0114 | 0.0106  | 0.0122 |
| 2  | State     | 0.0011       | -0.0012 | 0.0033 | 0.3527  | 0.0415              | 0.0094        | 0.0068  | 0.0129 | 0.0112 | 0.0105  | 0.0121 |
| 3  | State     | -0.0003      | -0.0023 | 0.0016 | 0.7244  | 0.0265              | 0.0106        | 0.0078  | 0.0144 | 0.0098 | 0.0091  | 0.0105 |
| 4  | State     | -0.0020      | -0.0041 | 0.0002 | 0.0686  | 0.0341              | 0.0069        | 0.0049  | 0.0097 | 0.0108 | 0.0100  | 0.0116 |
| 5  | State     | 0.0015       | -0.0008 | 0.0038 | 0.2039  | 0.0431              | 0.0085        | 0.0061  | 0.0117 | 0.0116 | 0.0108  | 0.0125 |
| 6  | State     | 0.0048       | 0.0024  | 0.0071 | 0.0001  | 0.0367              | 0.0096        | 0.0070  | 0.0133 | 0.0117 | 0.0109  | 0.0126 |
| 7  | State     | -0.0012      | -0.0033 | 0.0009 | 0.2646  | 0.0357              | 0.0082        | 0.0059  | 0.0113 | 0.0107 | 0.0100  | 0.0115 |
| 8  | State     | 0.0005       | -0.0014 | 0.0024 | 0.5917  | 0.0283              | 0.0067        | 0.0048  | 0.0093 | 0.0097 | 0.0090  | 0.0104 |
| 9  | State     | 0.0005       | -0.0016 | 0.0025 | 0.6520  | 0.0330              | 0.0080        | 0.0058  | 0.0111 | 0.0102 | 0.0095  | 0.0110 |
| 10 | State     | 0.0007       | -0.0015 | 0.0029 | 0.5365  | 0.0372              | 0.0101        | 0.0073  | 0.0138 | 0.0111 | 0.0103  | 0.0119 |
| 11 | State     | -0.0001      | -0.0019 | 0.0018 | 0.9564  | 0.0302              | 0.0059        | 0.0042  | 0.0082 | 0.0095 | 0.0088  | 0.0102 |
| 12 | State     | -0.0003      | -0.0022 | 0.0016 | 0.7742  | 0.0296              | 0.0063        | 0.0045  | 0.0087 | 0.0096 | 0.0090  | 0.0104 |
| 13 | State     | 0.0012       | -0.0010 | 0.0034 | 0.2813  | 0.0361              | 0.0075        | 0.0054  | 0.0104 | 0.0110 | 0.0103  | 0.0119 |
| 14 | State     | 0.0004       | -0.0017 | 0.0026 | 0.6956  | 0.0405              | 0.0102        | 0.0075  | 0.0140 | 0.0110 | 0.0102  | 0.0118 |
| 15 | State     | -0.0004      | -0.0024 | 0.0017 | 0.7258  | 0.0327              | 0.0073        | 0.0053  | 0.0102 | 0.0104 | 0.0097  | 0.0112 |
| 16 | State     | 0.0001       | -0.0019 | 0.0021 | 0.9317  | 0.0367              | 0.0091        | 0.0066  | 0.0125 | 0.0103 | 0.0095  | 0.0110 |
| 17 | State     | 0.0001       | -0.0022 | 0.0024 | 0.9314  | 0.0460              | 0.0111        | 0.0081  | 0.0152 | 0.0116 | 0.0108  | 0.0125 |

SD: standard deviation, CI: confident interval, the state consists of the rest state and task state, The value of the rest state is 0, and the value of the task state is 1, df = 18 (the number of period) \*22 (the number of participant) -2 (the number of estimated variable) = 394, Significance is identified by CI not including 0 and p-value < 0.05, Red shade means that identified significance exists in all wavelength data.

**Table S2.** Entropy ~ State+(1|subject) , 805 nm optical density data statistical results.

| CH | Parameter | Fixed effect |         |        |         | Estimated intercept | Random effect |         |        | Error  |         |        |
|----|-----------|--------------|---------|--------|---------|---------------------|---------------|---------|--------|--------|---------|--------|
|    |           | Effect size  | CI(95%) |        | p-value |                     | SD            | CI(95%) |        | SD     | CI(95%) |        |
|    |           |              | Lower   | Upper  |         |                     |               | Lower   | Upper  |        | Lower   | Upper  |
| 1  | State     | -0.0014      | -0.0036 | 0.0008 | 0.2217  | 0.0406              | 0.0084        | 0.0060  | 0.0116 | 0.0112 | 0.0104  | 0.0121 |
| 2  | State     | 0.0018       | -0.0005 | 0.0040 | 0.1234  | 0.0407              | 0.0085        | 0.0061  | 0.0117 | 0.0113 | 0.0105  | 0.0121 |
| 3  | State     | 0.0004       | -0.0015 | 0.0023 | 0.6678  | 0.0256              | 0.0096        | 0.0070  | 0.0131 | 0.0097 | 0.0090  | 0.0104 |
| 4  | State     | -0.0017      | -0.0037 | 0.0002 | 0.0751  | 0.0322              | 0.0055        | 0.0039  | 0.0078 | 0.0098 | 0.0091  | 0.0105 |
| 5  | State     | -0.0002      | -0.0025 | 0.0020 | 0.8462  | 0.0445              | 0.0087        | 0.0063  | 0.0120 | 0.0113 | 0.0105  | 0.0122 |
| 6  | State     | 0.0029       | 0.0006  | 0.0052 | 0.0144  | 0.0357              | 0.0079        | 0.0057  | 0.0110 | 0.0116 | 0.0108  | 0.0124 |
| 7  | State     | -0.0017      | -0.0036 | 0.0003 | 0.0900  | 0.0363              | 0.0078        | 0.0056  | 0.0107 | 0.0098 | 0.0091  | 0.0105 |
| 8  | State     | 0.0000       | -0.0018 | 0.0017 | 0.9791  | 0.0284              | 0.0052        | 0.0037  | 0.0074 | 0.0089 | 0.0083  | 0.0096 |
| 9  | State     | 0.0013       | -0.0008 | 0.0034 | 0.2222  | 0.0339              | 0.0073        | 0.0052  | 0.0101 | 0.0107 | 0.0100  | 0.0115 |
| 10 | State     | 0.0030       | 0.0008  | 0.0052 | 0.0086  | 0.0376              | 0.0090        | 0.0065  | 0.0124 | 0.0113 | 0.0105  | 0.0121 |
| 11 | State     | -0.0002      | -0.0021 | 0.0017 | 0.8412  | 0.0290              | 0.0049        | 0.0034  | 0.0070 | 0.0095 | 0.0088  | 0.0102 |
| 12 | State     | 0.0009       | -0.0011 | 0.0029 | 0.3889  | 0.0290              | 0.0061        | 0.0043  | 0.0086 | 0.0102 | 0.0095  | 0.0110 |
| 13 | State     | 0.0005       | -0.0015 | 0.0025 | 0.6177  | 0.0349              | 0.0063        | 0.0045  | 0.0089 | 0.0102 | 0.0095  | 0.0109 |
| 14 | State     | 0.0000       | -0.0021 | 0.0021 | 0.9937  | 0.0414              | 0.0096        | 0.0070  | 0.0131 | 0.0107 | 0.0100  | 0.0115 |
| 15 | State     | -0.0003      | -0.0022 | 0.0017 | 0.7652  | 0.0308              | 0.0056        | 0.0039  | 0.0079 | 0.0099 | 0.0092  | 0.0106 |
| 16 | State     | 0.0007       | -0.0013 | 0.0028 | 0.4914  | 0.0361              | 0.0091        | 0.0066  | 0.0125 | 0.0103 | 0.0096  | 0.0111 |
| 17 | State     | 0.0000       | -0.0021 | 0.0022 | 0.9804  | 0.0443              | 0.0107        | 0.0078  | 0.0147 | 0.0110 | 0.0102  | 0.0118 |

SD: standard deviation, CI: confident interval, the state consists of the rest state and task state, The value of the rest state is 0, and the value of the task state is 1, df = 18 (the number of period) \*22 (the number of participant) -2 (the number of estimated variable) = 394, Significance is identified by CI not including 0 and p-value < 0.05, Red shade means that identified significance exists in all wavelength data.

**Table S3.** Entropy ~ State+(1|subject) , 830 nm optical density data statistical results.

| CH | Parameter | Fixed effect |         |        |         | Estimated intercept | Random effect |         |        | Error  |         |        |
|----|-----------|--------------|---------|--------|---------|---------------------|---------------|---------|--------|--------|---------|--------|
|    |           | Effect size  | CI(95%) |        | p-value |                     | SD            | CI(95%) |        | SD     | CI(95%) |        |
|    |           |              | Lower   | Upper  |         |                     |               | Lower   | Upper  |        | Lower   | Upper  |
| 1  | State     | -0.0009      | -0.0030 | 0.0012 | 0.3927  | 0.0351              | 0.0073        | 0.0053  | 0.0102 | 0.0105 | 0.0097  | 0.0112 |
| 2  | State     | 0.0020       | -0.0001 | 0.0040 | 0.0576  | 0.0341              | 0.0080        | 0.0058  | 0.0110 | 0.0103 | 0.0096  | 0.0110 |
| 3  | State     | -0.0001      | -0.0018 | 0.0015 | 0.8942  | 0.0227              | 0.0075        | 0.0055  | 0.0103 | 0.0083 | 0.0077  | 0.0089 |
| 4  | State     | -0.0016      | -0.0035 | 0.0002 | 0.0739  | 0.0290              | 0.0043        | 0.0030  | 0.0062 | 0.0092 | 0.0085  | 0.0098 |
| 5  | State     | 0.0020       | -0.0001 | 0.0042 | 0.0651  | 0.0389              | 0.0073        | 0.0052  | 0.0102 | 0.0110 | 0.0102  | 0.0118 |
| 6  | State     | 0.0024       | 0.0004  | 0.0045 | 0.0213  | 0.0307              | 0.0065        | 0.0047  | 0.0091 | 0.0104 | 0.0097  | 0.0112 |
| 7  | State     | -0.0010      | -0.0028 | 0.0008 | 0.2631  | 0.0299              | 0.0058        | 0.0041  | 0.0081 | 0.0090 | 0.0084  | 0.0096 |
| 8  | State     | -0.0002      | -0.0018 | 0.0014 | 0.8484  | 0.0261              | 0.0045        | 0.0032  | 0.0064 | 0.0081 | 0.0075  | 0.0087 |
| 9  | State     | 0.0000       | -0.0017 | 0.0018 | 0.9913  | 0.0294              | 0.0053        | 0.0038  | 0.0075 | 0.0089 | 0.0083  | 0.0096 |
| 10 | State     | 0.0002       | -0.0018 | 0.0022 | 0.8658  | 0.0314              | 0.0076        | 0.0055  | 0.0105 | 0.0102 | 0.0095  | 0.0110 |
| 11 | State     | -0.0009      | -0.0027 | 0.0008 | 0.3036  | 0.0276              | 0.0050        | 0.0036  | 0.0071 | 0.0090 | 0.0084  | 0.0097 |
| 12 | State     | 0.0001       | -0.0016 | 0.0018 | 0.9243  | 0.0267              | 0.0045        | 0.0032  | 0.0065 | 0.0086 | 0.0080  | 0.0092 |

|    |       |         |         |        |        |        |        |        |        |        |        |        |
|----|-------|---------|---------|--------|--------|--------|--------|--------|--------|--------|--------|--------|
| 13 | State | 0.0002  | -0.0015 | 0.0020 | 0.7995 | 0.0303 | 0.0054 | 0.0038 | 0.0076 | 0.0088 | 0.0082 | 0.0095 |
| 14 | State | -0.0012 | -0.0032 | 0.0008 | 0.2547 | 0.0349 | 0.0076 | 0.0055 | 0.0105 | 0.0102 | 0.0095 | 0.0110 |
| 15 | State | -0.0008 | -0.0027 | 0.0010 | 0.3723 | 0.0278 | 0.0041 | 0.0028 | 0.0060 | 0.0093 | 0.0087 | 0.0100 |
| 16 | State | -0.0002 | -0.0020 | 0.0017 | 0.8622 | 0.0325 | 0.0077 | 0.0056 | 0.0106 | 0.0095 | 0.0088 | 0.0102 |
| 17 | State | -0.0002 | -0.0023 | 0.0018 | 0.8126 | 0.0402 | 0.0102 | 0.0074 | 0.0139 | 0.0104 | 0.0097 | 0.0112 |

SD: standard deviation, CI: confident interval, the state consists of the rest state and task state, The value of the rest state is 0, and the value of the task state is 1, df = 18 (the number of period) \*22 (the number of participant) -2 (the number of estimated variable) = 394, Significance is identified by CI not including 0 and p-value < 0.05, Red shade means that identified significance exists in all wavelength density data.

**Table S4.** Entropy ~ Rest duration+ (1|subject) , 780 nm optical density data statistical results.

| CH | Parameter | Fixed effect |         |        |         | Estimated intercept | Random effect |         |        | Error  |         |        |
|----|-----------|--------------|---------|--------|---------|---------------------|---------------|---------|--------|--------|---------|--------|
|    |           | Effect size* | CI(95%) |        | p-value |                     | SD            | CI(95%) |        | SD     | CI(95%) |        |
|    |           |              | Lower*  | Upper* |         |                     |               | Lower   | Upper  |        | Lower   | Upper  |
| 1  | RD        | 0.0588       | -0.2317 | 0.3492 | 0.6904  | 0.0405              | 0.0103        | 0.0074  | 0.0143 | 0.0107 | 0.0096  | 0.0119 |
| 2  | RD        | 0.1366       | -0.1465 | 0.4197 | 0.3426  | 0.0403              | 0.0108        | 0.0078  | 0.0149 | 0.0104 | 0.0094  | 0.0116 |
| 3  | RD        | -0.2010      | -0.4611 | 0.0591 | 0.1291  | 0.0283              | 0.0115        | 0.0083  | 0.0158 | 0.0096 | 0.0086  | 0.0106 |
| 4  | RD        | 0.0167       | -0.2835 | 0.3168 | 0.9129  | 0.0339              | 0.0062        | 0.0041  | 0.0092 | 0.0111 | 0.0100  | 0.0123 |
| 5  | RD        | -0.0977      | -0.4069 | 0.2115 | 0.5339  | 0.0440              | 0.0078        | 0.0054  | 0.0112 | 0.0114 | 0.0103  | 0.0126 |
| 6  | RD        | 0.0143       | -0.2703 | 0.2988 | 0.9213  | 0.0366              | 0.0094        | 0.0067  | 0.0132 | 0.0105 | 0.0094  | 0.0116 |
| 7  | RD        | 0.0369       | -0.2427 | 0.3165 | 0.7951  | 0.0354              | 0.0092        | 0.0066  | 0.0129 | 0.0103 | 0.0093  | 0.0114 |
| 8  | RD        | -0.0568      | -0.3116 | 0.1980 | 0.6609  | 0.0288              | 0.0066        | 0.0046  | 0.0095 | 0.0094 | 0.0085  | 0.0104 |
| 9  | RD        | -0.0920      | -0.3665 | 0.1825 | 0.5094  | 0.0338              | 0.0076        | 0.0054  | 0.0109 | 0.0101 | 0.0091  | 0.0112 |
| 10 | RD        | -0.0034      | -0.2646 | 0.2578 | 0.9795  | 0.0372              | 0.0118        | 0.0086  | 0.0163 | 0.0096 | 0.0087  | 0.0107 |
| 11 | RD        | -0.1842      | -0.4562 | 0.0877 | 0.1831  | 0.0319              | 0.0052        | 0.0034  | 0.0079 | 0.0100 | 0.0090  | 0.0111 |
| 12 | RD        | -0.0899      | -0.3556 | 0.1758 | 0.5054  | 0.0304              | 0.0063        | 0.0043  | 0.0092 | 0.0098 | 0.0088  | 0.0109 |
| 13 | RD        | -0.0598      | -0.3480 | 0.2284 | 0.6828  | 0.0366              | 0.0071        | 0.0049  | 0.0103 | 0.0106 | 0.0096  | 0.0118 |
| 14 | RD        | -0.1215      | -0.4065 | 0.1636 | 0.4017  | 0.0416              | 0.0108        | 0.0078  | 0.0150 | 0.0105 | 0.0095  | 0.0117 |
| 15 | RD        | -0.2471      | -0.5459 | 0.0517 | 0.1046  | 0.0349              | 0.0074        | 0.0051  | 0.0107 | 0.0110 | 0.0099  | 0.0122 |
| 16 | RD        | -0.1576      | -0.4015 | 0.0863 | 0.2039  | 0.0381              | 0.0102        | 0.0074  | 0.0141 | 0.0090 | 0.0081  | 0.0100 |
| 17 | RD        | 0.1103       | -0.2001 | 0.4206 | 0.4844  | 0.0450              | 0.0117        | 0.0085  | 0.0163 | 0.0114 | 0.0103  | 0.0127 |

RD: rest duration, \* :  $\times 10^{-3}$ , SD: standard deviation, CI: confident interval, Entropy calculated from the rest state only, df = 9 (the number of period) \*22 (the number of participant) -2 (the number of estimated variable) = 196, Significance is identified by CI not including 0 and p-value < 0.05

**Table S5.** Entropy ~ Rest duration+ (1|subject) , 805 nm optical density data statistical results.

| CH | Parameter | Fixed effect |         |        |         | Estimated intercept | Random effect |         |        | Error  |         |        |
|----|-----------|--------------|---------|--------|---------|---------------------|---------------|---------|--------|--------|---------|--------|
|    |           | Effect size* | CI(95%) |        | p-value |                     | SD            | CI(95%) |        | SD     | CI(95%) |        |
|    |           |              | Lower*  | Upper* |         |                     |               | Lower   | Upper  |        | Lower   | Upper  |
| 1  | RD        | 0.2614       | -0.0347 | 0.5576 | 0.0833  | 0.0383              | 0.0090        | 0.0063  | 0.0126 | 0.0109 | 0.0098  | 0.0121 |
| 2  | RD        | -0.1260      | -0.4414 | 0.1894 | 0.4318  | 0.0418              | 0.0087        | 0.0061  | 0.0124 | 0.0116 | 0.0105  | 0.0129 |
| 3  | RD        | -0.1233      | -0.3739 | 0.1272 | 0.3329  | 0.0267              | 0.0102        | 0.0074  | 0.0141 | 0.0092 | 0.0083  | 0.0102 |
| 4  | RD        | 0.2004       | -0.0629 | 0.4636 | 0.1350  | 0.0304              | 0.0052        | 0.0035  | 0.0079 | 0.0097 | 0.0087  | 0.0108 |
| 5  | RD        | 0.0296       | -0.2939 | 0.3530 | 0.8571  | 0.0442              | 0.0082        | 0.0057  | 0.0118 | 0.0119 | 0.0107  | 0.0132 |
| 6  | RD        | -0.1395      | -0.4426 | 0.1637 | 0.3654  | 0.0369              | 0.0087        | 0.0061  | 0.0123 | 0.0112 | 0.0101  | 0.0124 |
| 7  | RD        | 0.1827       | -0.0686 | 0.4341 | 0.1533  | 0.0347              | 0.0096        | 0.0069  | 0.0133 | 0.0093 | 0.0083  | 0.0103 |
| 8  | RD        | 0.1093       | -0.1333 | 0.3519 | 0.3754  | 0.0274              | 0.0052        | 0.0035  | 0.0077 | 0.0089 | 0.0081  | 0.0099 |
| 9  | RD        | 0.2223       | -0.0454 | 0.4901 | 0.1031  | 0.0319              | 0.0083        | 0.0059  | 0.0117 | 0.0099 | 0.0089  | 0.0110 |
| 10 | RD        | -0.0212      | -0.2807 | 0.2383 | 0.8722  | 0.0378              | 0.0104        | 0.0075  | 0.0144 | 0.0096 | 0.0086  | 0.0106 |
| 11 | RD        | -0.0674      | -0.3308 | 0.1960 | 0.6144  | 0.0296              | 0.0049        | 0.0032  | 0.0075 | 0.0097 | 0.0087  | 0.0108 |
| 12 | RD        | 0.1229       | -0.1652 | 0.4111 | 0.4011  | 0.0279              | 0.0055        | 0.0036  | 0.0084 | 0.0106 | 0.0096  | 0.0118 |
| 13 | RD        | 0.0788       | -0.1862 | 0.3438 | 0.5582  | 0.0342              | 0.0062        | 0.0042  | 0.0090 | 0.0098 | 0.0088  | 0.0108 |
| 14 | RD        | 0.0389       | -0.2357 | 0.3135 | 0.7801  | 0.0411              | 0.0104        | 0.0075  | 0.0144 | 0.0101 | 0.0091  | 0.0112 |
| 15 | RD        | -0.0122      | -0.2811 | 0.2567 | 0.9289  | 0.0309              | 0.0054        | 0.0036  | 0.0081 | 0.0099 | 0.0089  | 0.0110 |
| 16 | RD        | -0.0246      | -0.2965 | 0.2474 | 0.8587  | 0.0364              | 0.0092        | 0.0066  | 0.0129 | 0.0100 | 0.0090  | 0.0111 |
| 17 | RD        | -0.0088      | -0.3005 | 0.2829 | 0.9524  | 0.0444              | 0.0116        | 0.0084  | 0.0160 | 0.0107 | 0.0097  | 0.0119 |

RD: rest duration, \* :  $\times 10^{-3}$ , SD: standard deviation, CI: confident interval, Entropy calculated from the rest state only, df = 9 (the number of period) \*22 (the number of participant) -2 (the number of estimated variable) = 196, Significance is identified by CI not including 0 and p-value < 0.05

**Table S6.** Entropy ~ Rest duration+ (1|subject) , 830 nm optical density data statistical results.

| CH | Parameter | Fixed effect |         |        |         | Estimated intercept | Random effect |         |        | Error  |         |        |
|----|-----------|--------------|---------|--------|---------|---------------------|---------------|---------|--------|--------|---------|--------|
|    |           | Effect size* | CI(95%) |        | p-value |                     | SD            | CI(95%) |        | SD     | CI(95%) |        |
|    |           |              | Lower*  | Upper* |         |                     |               | Lower   | Upper  |        | Lower   | Upper  |
| 1  | RD        | 0.1549       | -0.1239 | 0.4338 | 0.2746  | 0.0337              | 0.0078        | 0.0055  | 0.0111 | 0.0103 | 0.0093  | 0.0114 |
| 2  | RD        | -0.0148      | -0.2666 | 0.2369 | 0.9077  | 0.0342              | 0.0084        | 0.0060  | 0.0117 | 0.0093 | 0.0084  | 0.0103 |
| 3  | RD        | -0.0957      | -0.3100 | 0.1185 | 0.3791  | 0.0235              | 0.0087        | 0.0063  | 0.0121 | 0.0079 | 0.0071  | 0.0088 |
| 4  | RD        | 0.2276       | -0.0125 | 0.4677 | 0.0630  | 0.0270              | 0.0044        | 0.0029  | 0.0068 | 0.0088 | 0.0080  | 0.0098 |
| 5  | RD        | 0.0695       | -0.2322 | 0.3712 | 0.6502  | 0.0383              | 0.0067        | 0.0045  | 0.0098 | 0.0111 | 0.0100  | 0.0123 |
| 6  | RD        | -0.1509      | -0.4286 | 0.1268 | 0.2853  | 0.0320              | 0.0067        | 0.0046  | 0.0097 | 0.0102 | 0.0092  | 0.0114 |
| 7  | RD        | 0.2664       | 0.0360  | 0.4969 | 0.0237  | 0.0275              | 0.0064        | 0.0045  | 0.0091 | 0.0085 | 0.0076  | 0.0094 |
| 8  | RD        | 0.1810       | -0.0395 | 0.4013 | 0.1070  | 0.0245              | 0.0048        | 0.0033  | 0.0071 | 0.0081 | 0.0073  | 0.0090 |
| 9  | RD        | 0.0639       | -0.1715 | 0.2992 | 0.5931  | 0.0288              | 0.0057        | 0.0039  | 0.0083 | 0.0087 | 0.0078  | 0.0096 |
| 10 | RD        | 0.0527       | -0.1968 | 0.3021 | 0.6776  | 0.0309              | 0.0095        | 0.0069  | 0.0132 | 0.0092 | 0.0083  | 0.0102 |
| 11 | RD        | -0.0484      | -0.3056 | 0.2088 | 0.7111  | 0.0281              | 0.0056        | 0.0037  | 0.0082 | 0.0095 | 0.0085  | 0.0105 |
| 12 | RD        | 0.0023       | -0.2294 | 0.2340 | 0.9844  | 0.0267              | 0.0045        | 0.0030  | 0.0068 | 0.0085 | 0.0077  | 0.0095 |
| 13 | RD        | -0.0001      | -0.2256 | 0.2254 | 0.9993  | 0.0303              | 0.0059        | 0.0041  | 0.0085 | 0.0083 | 0.0075  | 0.0092 |
| 14 | RD        | 0.0215       | -0.2480 | 0.2910 | 0.8751  | 0.0348              | 0.0085        | 0.0060  | 0.0119 | 0.0099 | 0.0089  | 0.0110 |
| 15 | RD        | -0.0483      | -0.3019 | 0.2054 | 0.7079  | 0.0282              | 0.0051        | 0.0034  | 0.0076 | 0.0093 | 0.0084  | 0.0104 |
| 16 | RD        | 0.0358       | -0.1960 | 0.2675 | 0.7611  | 0.0321              | 0.0081        | 0.0058  | 0.0112 | 0.0085 | 0.0077  | 0.0095 |
| 17 | RD        | 0.1890       | -0.0843 | 0.4623 | 0.1743  | 0.0385              | 0.0102        | 0.0074  | 0.0142 | 0.0101 | 0.0091  | 0.0112 |

RD: rest duration, \*:  $\times 10^{-3}$ , SD: standard deviation, CI: confident interval, Entropy calculated from the rest state only, df = 9 (the number of period) \*22 (the number of participant) -2 (the number of estimated variable) = 196, Significance is identified by CI not including 0 and p-value < 0.05, Gray shade means that identified significance exists only in this 830 nm wavelength density data.

**Table S7.** Entropy ~ Task duration+ $\omega_n + \zeta$ +(1|subject) , 780 nm optical density data statistical results.

| CH | Parameter | Fixed effect |         |         |         | Estimated intercept | Random effect |         |        | Error  |         |        |
|----|-----------|--------------|---------|---------|---------|---------------------|---------------|---------|--------|--------|---------|--------|
|    |           | Effect size* | CI(95%) |         | p-value |                     | SD            | CI(95%) |        | SD     | CI(95%) |        |
|    |           |              | Lower*  | Upper*  |         |                     |               | Lower   | Upper  |        | Lower   | Upper  |
| 1  | NF        | -1.1429      | -2.1869 | -0.0990 | 0.0321  | 0.0378              | 0.0093        | 0.0066  | 0.0132 | 0.0120 | 0.0108  | 0.0133 |
|    | DR        | 0.8810       | -3.2294 | 4.9913  | 0.6730  |                     |               |         |        |        |         |        |
|    | TD        | 0.4318       | 0.1012  | 0.7625  | 0.0107  |                     |               |         |        |        |         |        |
| 2  | NF        | 0.4231       | -0.5794 | 1.4257  | 0.4062  | 0.0407              | 0.0083        | 0.0058  | 0.0119 | 0.0115 | 0.0103  | 0.0127 |
|    | DR        | -2.0181      | -5.9655 | 1.9292  | 0.3146  |                     |               |         |        |        |         |        |
|    | TD        | 0.2635       | -0.0541 | 0.5810  | 0.1034  |                     |               |         |        |        |         |        |
| 3  | NF        | -0.8985      | -1.7501 | -0.0469 | 0.0388  | 0.0290              | 0.0097        | 0.0070  | 0.0135 | 0.0098 | 0.0088  | 0.0108 |
|    | DR        | -1.5803      | -4.9334 | 1.7727  | 0.3538  |                     |               |         |        |        |         |        |
|    | TD        | 0.1448       | -0.1250 | 0.4145  | 0.2912  |                     |               |         |        |        |         |        |
| 4  | NF        | -0.7752      | -1.6575 | 0.1070  | 0.0847  | 0.0304              | 0.0078        | 0.0055  | 0.0111 | 0.0101 | 0.0091  | 0.0112 |
|    | DR        | 0.2879       | -3.1859 | 3.7616  | 0.8703  |                     |               |         |        |        |         |        |
|    | TD        | 0.3764       | 0.0970  | 0.6558  | 0.0085  |                     |               |         |        |        |         |        |
| 5  | NF        | -1.0540      | -2.0512 | -0.0567 | 0.0384  | 0.0440              | 0.0091        | 0.0064  | 0.0129 | 0.0114 | 0.0103  | 0.0127 |
|    | DR        | -1.7400      | -5.6664 | 2.1865  | 0.3832  |                     |               |         |        |        |         |        |
|    | TD        | 0.5538       | 0.2380  | 0.8697  | 0.0007  |                     |               |         |        |        |         |        |
| 6  | NF        | -0.8593      | -1.9512 | 0.2327  | 0.1223  | 0.0408              | 0.0099        | 0.0070  | 0.0141 | 0.0125 | 0.0113  | 0.0139 |
|    | DR        | -1.1879      | -5.4872 | 3.1115  | 0.5864  |                     |               |         |        |        |         |        |
|    | TD        | 0.4456       | 0.0997  | 0.7914  | 0.0118  |                     |               |         |        |        |         |        |
| 7  | NF        | -1.0392      | -1.9925 | -0.0859 | 0.0328  | 0.0346              | 0.0072        | 0.0050  | 0.0105 | 0.0109 | 0.0098  | 0.0121 |
|    | DR        | 0.4223       | -3.3313 | 4.1758  | 0.8247  |                     |               |         |        |        |         |        |
|    | TD        | 0.2566       | -0.0453 | 0.5585  | 0.0953  |                     |               |         |        |        |         |        |
| 8  | NF        | 0.0699       | -0.7215 | 0.8613  | 0.8619  | 0.0242              | 0.0076        | 0.0054  | 0.0108 | 0.0091 | 0.0082  | 0.0101 |
|    | DR        | 0.7646       | -2.3516 | 3.8807  | 0.6290  |                     |               |         |        |        |         |        |
|    | TD        | 0.3666       | 0.1160  | 0.6173  | 0.0044  |                     |               |         |        |        |         |        |
| 9  | NF        | -0.5952      | -1.4681 | 0.2778  | 0.1803  | 0.0338              | 0.0086        | 0.0061  | 0.0121 | 0.0100 | 0.0090  | 0.0111 |
|    | DR        | -1.5406      | -4.9777 | 1.8965  | 0.3778  |                     |               |         |        |        |         |        |
|    | TD        | 0.2968       | 0.0203  | 0.5733  | 0.0355  |                     |               |         |        |        |         |        |
| 10 | NF        | -0.6627      | -1.6996 | 0.3742  | 0.2090  | 0.0406              | 0.0086        | 0.0060  | 0.0123 | 0.0119 | 0.0107  | 0.0132 |
|    | DR        | -0.6899      | -4.7725 | 3.3927  | 0.7393  |                     |               |         |        |        |         |        |
|    | TD        | -0.0100      | -0.3384 | 0.3184  | 0.9523  |                     |               |         |        |        |         |        |
| 11 | NF        | 0.4687       | -0.2827 | 1.2202  | 0.2201  | 0.0298              | 0.0068        | 0.0048  | 0.0096 | 0.0086 | 0.0078  | 0.0096 |
|    | DR        | -1.2626      | -4.2213 | 1.6961  | 0.4010  |                     |               |         |        |        |         |        |
|    | TD        | 0.0229       | -0.2151 | 0.2609  | 0.8494  |                     |               |         |        |        |         |        |
| 12 | NF        | -0.4080      | -1.2065 | 0.3905  | 0.3148  | 0.0296              | 0.0064        | 0.0045  | 0.0093 | 0.0091 | 0.0082  | 0.0101 |
|    | DR        | -1.9222      | -5.0661 | 1.2216  | 0.2293  |                     |               |         |        |        |         |        |
|    | TD        | 0.2875       | 0.0346  | 0.5404  | 0.0261  |                     |               |         |        |        |         |        |

|    |    |         |         |         |        |        |        |        |        |        |        |        |
|----|----|---------|---------|---------|--------|--------|--------|--------|--------|--------|--------|--------|
| 13 | NF | -0.9539 | -1.8752 | -0.0325 | 0.0425 | 0.0367 | 0.0082 | 0.0058 | 0.0117 | 0.0105 | 0.0095 | 0.0117 |
|    | DR | -2.8674 | -6.4951 | 0.7602  | 0.1206 |        |        |        |        |        |        |        |
|    | TD | 0.6352  | 0.3434  | 0.9269  | 0.0000 |        |        |        |        |        |        |        |
| 14 | NF | -0.5799 | -1.5522 | 0.3924  | 0.2409 | 0.0419 | 0.0098 | 0.0070 | 0.0138 | 0.0111 | 0.0100 | 0.0124 |
|    | DR | -1.0973 | -4.9255 | 2.7309  | 0.5725 |        |        |        |        |        |        |        |
|    | TD | 0.1882  | -0.1197 | 0.4962  | 0.2294 |        |        |        |        |        |        |        |
| 15 | NF | 0.0287  | -0.8204 | 0.8778  | 0.9470 | 0.0343 | 0.0071 | 0.0050 | 0.0102 | 0.0097 | 0.0088 | 0.0108 |
|    | DR | -2.8389 | -6.1821 | 0.5044  | 0.0956 |        |        |        |        |        |        |        |
|    | TD | 0.0789  | -0.1901 | 0.3478  | 0.5637 |        |        |        |        |        |        |        |
| 16 | NF | -1.0818 | -2.0282 | -0.1354 | 0.0253 | 0.0384 | 0.0083 | 0.0058 | 0.0118 | 0.0108 | 0.0098 | 0.0120 |
|    | DR | -0.7526 | -4.4790 | 2.9738  | 0.6908 |        |        |        |        |        |        |        |
|    | TD | 0.2383  | -0.0614 | 0.5381  | 0.1185 |        |        |        |        |        |        |        |
| 17 | NF | -0.9423 | -1.8979 | 0.0133  | 0.0532 | 0.0490 | 0.0110 | 0.0080 | 0.0153 | 0.0109 | 0.0099 | 0.0121 |
|    | DR | -3.4875 | -7.2501 | 0.2750  | 0.0691 |        |        |        |        |        |        |        |
|    | TD | 0.3387  | 0.0360  | 0.6413  | 0.0285 |        |        |        |        |        |        |        |

NF: natural frequency, DR: damping ratio, TD: task duration,  $\bullet^*$ :  $\times 10^{-3}$ , SD: standard deviation, CI: confident interval, df = 9 (the number of period) \*22 (the number of participant) -4 (the number of estimated variable) = 194, Significance is identified by CI not including 0 and p-value < 0.05, Gray shade means that identified significance exists only in this 780 nm optical density data, Blue shade means that identified significance exists not only in this 780 nm wavelength data but also in 805 or 830nm wavelength data, Red shade means that identified significance exists in all wavelength data.

**Table S8.** Entropy  $\sim$  Task duration +  $\omega_n + \zeta + (1|\text{subject})$ , 805 nm optical density data statistical results.

| CH | Parameter | Fixed effect |         |         |         | Estimated intercept | Random effect |         |        | Error  |         |        |
|----|-----------|--------------|---------|---------|---------|---------------------|---------------|---------|--------|--------|---------|--------|
|    |           | Effect size* | CI(95%) |         | p-value |                     | SD            | CI(95%) |        | SD     | CI(95%) |        |
|    |           |              | Lower*  | Upper*  |         |                     |               | Lower   | Upper  |        | Lower   | Upper  |
| 1  | NF        | -1.1459      | -2.1427 | -0.1491 | 0.0245  | 0.0442              | 0.0075        | 0.0052  | 0.0109 | 0.0114 | 0.0103  | 0.0127 |
|    | DR        | -2.2554      | -6.1802 | 1.6695  | 0.2585  |                     |               |         |        |        |         |        |
| 2  | TD        | 0.0713       | -0.2445 | 0.3870  | 0.6567  | 0.0421              | 0.0081        | 0.0057  | 0.0116 | 0.0110 | 0.0099  | 0.0122 |
|    | NF        | -0.3528      | -1.3100 | 0.6044  | 0.4682  |                     |               |         |        |        |         |        |
| 3  | DR        | -0.4017      | -4.1706 | 3.3672  | 0.8337  | 0.0291              | 0.0088        | 0.0063  | 0.0124 | 0.0101 | 0.0091  | 0.0112 |
|    | TD        | 0.1818       | -0.1213 | 0.4850  | 0.2383  |                     |               |         |        |        |         |        |
| 4  | NF        | -0.7273      | -1.6071 | 0.1525  | 0.1047  | 0.0324              | 0.0058        | 0.0039  | 0.0085 | 0.0094 | 0.0084  | 0.0104 |
|    | DR        | -0.4613      | -3.9254 | 3.0027  | 0.7931  |                     |               |         |        |        |         |        |
| 5  | TD        | -0.0409      | -0.3195 | 0.2378  | 0.7727  | 0.0431              | 0.0089        | 0.0063  | 0.0125 | 0.0108 | 0.0097  | 0.0119 |
|    | NF        | -0.7141      | -1.5309 | 0.1027  | 0.0862  |                     |               |         |        |        |         |        |
| 6  | DR        | -3.6693      | -6.8851 | -0.4534 | 0.0256  | 0.0420              | 0.0075        | 0.0052  | 0.0109 | 0.0114 | 0.0103  | 0.0127 |
|    | TD        | 0.3840       | 0.1253  | 0.6426  | 0.0038  |                     |               |         |        |        |         |        |
| 7  | NF        | -0.2829      | -1.2218 | 0.6560  | 0.5530  | 0.0369              | 0.0062        | 0.0043  | 0.0090 | 0.0096 | 0.0087  | 0.0107 |
|    | DR        | -0.8547      | -4.5516 | 2.8422  | 0.6489  |                     |               |         |        |        |         |        |
| 8  | TD        | 0.2854       | -0.0120 | 0.5828  | 0.0599  | 0.0247              | 0.0055        | 0.0038  | 0.0080 | 0.0085 | 0.0077  | 0.0094 |
|    | NF        | -1.4137      | -2.4112 | -0.4162 | 0.0057  |                     |               |         |        |        |         |        |
| 9  | DR        | -1.0171      | -4.9445 | 2.9104  | 0.6101  | 0.0370              | 0.0063        | 0.0043  | 0.0093 | 0.0106 | 0.0096  | 0.0118 |
|    | TD        | 0.1807       | -0.1352 | 0.4967  | 0.2606  |                     |               |         |        |        |         |        |
| 10 | NF        | -0.6976      | -1.5375 | 0.1424  | 0.1031  | 0.0344              | 0.0065        | 0.0044  | 0.0096 | 0.0110 | 0.0099  | 0.0122 |
|    | DR        | -0.4823      | -3.7896 | 2.8249  | 0.7739  |                     |               |         |        |        |         |        |
| 11 | TD        | 0.0396       | -0.2264 | 0.3056  | 0.7694  | 0.0435              | 0.0080        | 0.0055  | 0.0116 | 0.0122 | 0.0110  | 0.0135 |
|    | NF        | -0.0478      | -0.7903 | 0.6947  | 0.8991  |                     |               |         |        |        |         |        |
| 12 | DR        | -0.2224      | -3.1458 | 2.7010  | 0.8809  | 0.0267              | 0.0054        | 0.0037  | 0.0080 | 0.0088 | 0.0079  | 0.0097 |
|    | TD        | 0.3976       | 0.1625  | 0.6328  | 0.0010  |                     |               |         |        |        |         |        |
| 13 | NF        | -0.8545      | -1.8158 | 0.1068  | 0.0812  | 0.0310              | 0.0065        | 0.0045  | 0.0094 | 0.0098 | 0.0088  | 0.0109 |
|    | DR        | 0.4189       | -3.3661 | 4.2039  | 0.8275  |                     |               |         |        |        |         |        |
| 14 | TD        | 0.3024       | -0.0021 | 0.6068  | 0.0516  | 0.0370              | 0.0063        | 0.0043  | 0.0093 | 0.0106 | 0.0096  | 0.0118 |
|    | NF        | -1.3942      | -2.4600 | -0.3284 | 0.0106  |                     |               |         |        |        |         |        |
| 15 | DR        | -0.1031      | -4.2996 | 4.0933  | 0.9614  | 0.0449              | 0.0090        | 0.0064  | 0.0127 | 0.0107 | 0.0097  | 0.0119 |
|    | TD        | 0.1334       | -0.2042 | 0.4709  | 0.4368  |                     |               |         |        |        |         |        |
| 16 | NF        | 0.7252       | -0.0412 | 1.4915  | 0.0635  | 0.0344              | 0.0055        | 0.0037  | 0.0083 | 0.0099 | 0.0089  | 0.0110 |
|    | DR        | -1.3963      | -4.4137 | 1.6211  | 0.3626  |                     |               |         |        |        |         |        |
| 17 | TD        | 0.1280       | -0.1148 | 0.3707  | 0.2998  | 0.0416              | 0.0091        | 0.0065  | 0.0128 | 0.0103 | 0.0093  | 0.0115 |
|    | NF        | -0.3368      | -1.1910 | 0.5174  | 0.4377  |                     |               |         |        |        |         |        |
| 18 | DR        | -2.1673      | -5.5306 | 1.1960  | 0.2053  | 0.0416              | 0.0091        | 0.0065  | 0.0128 | 0.0103 | 0.0093  | 0.0115 |
|    | TD        | 0.2039       | -0.0667 | 0.4744  | 0.1389  |                     |               |         |        |        |         |        |
| 19 | NF        | -0.5726      | -1.5007 | 0.3554  | 0.2251  | 0.0370              | 0.0063        | 0.0043  | 0.0093 | 0.0106 | 0.0096  | 0.0118 |
|    | DR        | -0.9849      | -4.6390 | 2.6691  | 0.5956  |                     |               |         |        |        |         |        |
| 20 | TD        | 0.1161       | -0.1778 | 0.4101  | 0.4367  | 0.0449              | 0.0090        | 0.0064  | 0.0127 | 0.0107 | 0.0097  | 0.0119 |
|    | NF        | -1.5632      | -2.4999 | -0.6265 | 0.0012  |                     |               |         |        |        |         |        |
| 21 | DR        | -0.4388      | -4.1269 | 3.2493  | 0.8147  | 0.0344              | 0.0055        | 0.0037  | 0.0083 | 0.0099 | 0.0089  | 0.0110 |
|    | TD        | 0.1677       | -0.1290 | 0.4643  | 0.2664  |                     |               |         |        |        |         |        |
| 22 | NF        | -0.3621      | -1.2257 | 0.5015  | 0.4093  | 0.0416              | 0.0091        | 0.0065  | 0.0128 | 0.0103 | 0.0093  | 0.0115 |
|    | DR        | -3.1823      | -6.5827 | 0.2180  | 0.0664  |                     |               |         |        |        |         |        |
| 23 | TD        | 0.0341       | -0.2394 | 0.3076  | 0.8059  | 0.0416              | 0.0091        | 0.0065  | 0.0128 | 0.0103 | 0.0093  | 0.0115 |
|    | NF        | -0.8043      | -1.7051 | 0.0965  | 0.0798  |                     |               |         |        |        |         |        |

|    |    |         |         |         |        |        |        |        |        |        |        |        |
|----|----|---------|---------|---------|--------|--------|--------|--------|--------|--------|--------|--------|
| 17 | DR | -3.6059 | -7.1527 | -0.0591 | 0.0463 | 0.0465 | 0.0099 | 0.0071 | 0.0139 | 0.0109 | 0.0098 | 0.0121 |
|    | TD | 0.1268  | -0.1585 | 0.4121  | 0.3818 |        |        |        |        |        |        |        |
|    | NF | -0.9102 | -1.8622 | 0.0417  | 0.0608 |        |        |        |        |        |        |        |
|    | DR | 0.2291  | -3.5191 | 3.9773  | 0.9042 |        |        |        |        |        |        |        |
|    | TD | 0.0402  | -0.2613 | 0.3417  | 0.7929 |        |        |        |        |        |        |        |

NF: natural frequency, DR: damping ratio, TD: task duration,  $\bullet^*$ :  $\times 10^{-3}$ , SD: standard deviation, CI: confident interval, df = 9 (the number of period) \*22 (the number of participant) -4 (the number of estimated variable) = 194, Significance is identified by CI not including 0 and p-value < 0.05, Gray shade means that identified significance exists only in this 805 nm wavelength data, Blue shade means that identified significance exists not only in this 805 nm wavelength data but also in 780 or 830nm wavelength data, Red shade means that identified significance exists in all wavelength data.

**Table S9. Entropy  $\sim$  Task duration+ $\omega_n + \zeta + (1|\text{subject})$ , 830 nm optical density data statistical results.**

| CH | Parameter | Fixed effect |         |         |         | Estimated intercept | Random effect |         |        | Error  |         |        |
|----|-----------|--------------|---------|---------|---------|---------------------|---------------|---------|--------|--------|---------|--------|
|    |           | Effect size* | CI(95%) |         | p-value |                     | SD            | CI(95%) |        | SD     | CI(95%) |        |
|    |           |              | Lower*  | Upper*  |         |                     |               | Lower   | Upper  |        | Lower   | Upper  |
| 1  | NF        | -0.5180      | -1.4513 | 0.4154  | 0.2751  | 0.0373              | 0.0067        | 0.0045  | 0.0097 | 0.0107 | 0.0096  | 0.0119 |
|    | DR        | -2.2619      | -5.9368 | 1.4131  | 0.2263  |                     |               |         |        |        |         |        |
|    | TD        | 0.0695       | -0.2261 | 0.3651  | 0.6433  |                     |               |         |        |        |         |        |
| 2  | NF        | -0.0179      | -0.9773 | 0.9416  | 0.9707  | 0.0343              | 0.0078        | 0.0054  | 0.0112 | 0.0110 | 0.0099  | 0.0122 |
|    | DR        | -0.4736      | -4.2512 | 3.3041  | 0.8050  |                     |               |         |        |        |         |        |
|    | TD        | 0.2261       | -0.0778 | 0.5299  | 0.1439  |                     |               |         |        |        |         |        |
| 3  | NF        | -0.5136      | -1.2677 | 0.2405  | 0.1808  | 0.0232              | 0.0061        | 0.0043  | 0.0088 | 0.0086 | 0.0078  | 0.0096 |
|    | DR        | 0.7877       | -2.1815 | 3.7568  | 0.6014  |                     |               |         |        |        |         |        |
|    | TD        | 0.0123       | -0.2265 | 0.2511  | 0.9193  |                     |               |         |        |        |         |        |
| 4  | NF        | -0.8239      | -1.5891 | -0.0587 | 0.0350  | 0.0297              | 0.0046        | 0.0031  | 0.0070 | 0.0088 | 0.0079  | 0.0097 |
|    | DR        | -3.4965      | -6.5094 | -0.4836 | 0.0232  |                     |               |         |        |        |         |        |
|    | TD        | 0.3606       | 0.1183  | 0.6030  | 0.0037  |                     |               |         |        |        |         |        |
| 5  | NF        | -0.6322      | -1.5670 | 0.3027  | 0.1839  | 0.0398              | 0.0078        | 0.0055  | 0.0112 | 0.0107 | 0.0096  | 0.0119 |
|    | DR        | -0.3037      | -3.9846 | 3.3772  | 0.8709  |                     |               |         |        |        |         |        |
|    | TD        | 0.3343       | 0.0382  | 0.6304  | 0.0271  |                     |               |         |        |        |         |        |
| 6  | NF        | -0.9333      | -1.8432 | -0.0233 | 0.0445  | 0.0334              | 0.0062        | 0.0042  | 0.0092 | 0.0104 | 0.0094  | 0.0116 |
|    | DR        | -1.4144      | -4.9972 | 2.1684  | 0.4372  |                     |               |         |        |        |         |        |
|    | TD        | 0.3963       | 0.1082  | 0.6845  | 0.0073  |                     |               |         |        |        |         |        |
| 7  | NF        | -0.7009      | -1.5204 | 0.1185  | 0.0932  | 0.0308              | 0.0048        | 0.0032  | 0.0074 | 0.0094 | 0.0085  | 0.0104 |
|    | DR        | 0.0771       | -3.1495 | 3.3036  | 0.9625  |                     |               |         |        |        |         |        |
|    | TD        | 0.0092       | -0.2503 | 0.2688  | 0.9442  |                     |               |         |        |        |         |        |
| 8  | NF        | -0.0138      | -0.6620 | 0.6344  | 0.9666  | 0.0233              | 0.0047        | 0.0032  | 0.0069 | 0.0074 | 0.0067  | 0.0082 |
|    | DR        | -0.9289      | -3.4810 | 1.6233  | 0.4737  |                     |               |         |        |        |         |        |
|    | TD        | 0.3621       | 0.1568  | 0.5673  | 0.0006  |                     |               |         |        |        |         |        |
| 9  | NF        | -0.7048      | -1.4818 | 0.0722  | 0.0752  | 0.0282              | 0.0050        | 0.0033  | 0.0074 | 0.0089 | 0.0080  | 0.0099 |
|    | DR        | 0.1350       | -2.9244 | 3.1943  | 0.9307  |                     |               |         |        |        |         |        |
|    | TD        | 0.3163       | 0.0702  | 0.5624  | 0.0120  |                     |               |         |        |        |         |        |
| 10 | NF        | -0.6814      | -1.6207 | 0.2578  | 0.1541  | 0.0318              | 0.0057        | 0.0038  | 0.0086 | 0.0108 | 0.0097  | 0.0119 |
|    | DR        | 0.3880       | -3.3100 | 4.0860  | 0.8363  |                     |               |         |        |        |         |        |
|    | TD        | 0.1424       | -0.1551 | 0.4398  | 0.3464  |                     |               |         |        |        |         |        |
| 11 | NF        | 0.5076       | -0.1812 | 1.1964  | 0.1477  | 0.0239              | 0.0052        | 0.0036  | 0.0076 | 0.0079 | 0.0071  | 0.0088 |
|    | DR        | -0.6079      | -3.3200 | 2.1041  | 0.6589  |                     |               |         |        |        |         |        |
|    | TD        | 0.1861       | -0.0321 | 0.4042  | 0.0941  |                     |               |         |        |        |         |        |
| 12 | NF        | -0.2131      | -0.9622 | 0.5360  | 0.5754  | 0.0258              | 0.0044        | 0.0029  | 0.0068 | 0.0086 | 0.0077  | 0.0095 |
|    | DR        | -0.9669      | -3.9165 | 1.9826  | 0.5187  |                     |               |         |        |        |         |        |
|    | TD        | 0.2618       | 0.0245  | 0.4990  | 0.0308  |                     |               |         |        |        |         |        |
| 13 | NF        | -0.1818      | -0.9722 | 0.6086  | 0.6506  | 0.0298              | 0.0051        | 0.0034  | 0.0076 | 0.0091 | 0.0082  | 0.0100 |
|    | DR        | -0.5870      | -3.6992 | 2.5252  | 0.7103  |                     |               |         |        |        |         |        |
|    | TD        | 0.1863       | -0.0641 | 0.4366  | 0.1439  |                     |               |         |        |        |         |        |
| 14 | NF        | -0.4716      | -1.3868 | 0.4436  | 0.3108  | 0.0339              | 0.0065        | 0.0045  | 0.0096 | 0.0105 | 0.0094  | 0.0116 |
|    | DR        | -1.1622      | -4.7657 | 2.4413  | 0.5255  |                     |               |         |        |        |         |        |
|    | TD        | 0.2426       | -0.0473 | 0.5325  | 0.1004  |                     |               |         |        |        |         |        |
| 15 | NF        | -0.5074      | -1.3467 | 0.3319  | 0.2346  | 0.0291              |               |         |        | 0.0096 | 0.0087  | 0.0106 |
|    | DR        | -2.4197      | -5.7243 | 0.8849  | 0.1503  |                     |               |         |        |        |         |        |
|    | TD        | 0.1755       | -0.0903 | 0.4413  | 0.1943  |                     |               |         |        |        |         |        |
| 16 | NF        | -1.0418      | -1.9317 | -0.1519 | 0.0220  | 0.0362              | 0.0073        | 0.0051  | 0.0105 | 0.0102 | 0.0092  | 0.0113 |
|    | DR        | -2.0809      | -5.5848 | 1.4229  | 0.2429  |                     |               |         |        |        |         |        |
|    | TD        | 0.1280       | -0.1539 | 0.4098  | 0.3717  |                     |               |         |        |        |         |        |
| 17 | NF        | -0.8872      | -1.8136 | 0.0393  | 0.0604  | 0.0436              | 0.0101        | 0.0072  | 0.0140 | 0.0106 | 0.0096  | 0.0118 |
|    | DR        | -2.8585      | -6.5062 | 0.7892  | 0.1238  |                     |               |         |        |        |         |        |
|    | TD        | 0.1812       | -0.1123 | 0.4746  | 0.2248  |                     |               |         |        |        |         |        |

NF: natural frequency, DR: damping ratio, TD: task duration,  $\bullet^*$ :  $\times 10^{-3}$ , SD: standard deviation, CI: confident interval, df = 9 (the number of period) \*22 (the number of participant) -4 (the number of estimated variable) = 194, Significance is identified by CI not including 0 and p-value < 0.05, Gray shade means that identified significance exists only in this 830 nm wavelength data, Blue shade means that identified significance exists not only in this 830 nm wavelength data but also in 780 or 805nm wavelength data, Red shade means that identified significance exists in all wavelength data. Blank in random effect column means there is no random effect.

**Table S10.** Signal amplitude ~ State+(1|subject) , 780 nm optical density data statistical results.

| CH | Parameter | Fixed effect |         |        |         | Estimated intercept | Random effect |         |        | Error  |         |       |
|----|-----------|--------------|---------|--------|---------|---------------------|---------------|---------|--------|--------|---------|-------|
|    |           | Effect size  | CI(95%) |        | p-value |                     | SD            | CI(95%) |        | SD     | CI(95%) |       |
|    |           |              | Lower   | Upper  |         |                     |               | Lower   | Upper  |        | Lower   | Upper |
| 1  | State     | 0.0025       | 0.0013  | 0.0038 | 0.0001  | -0.0013             |               |         | 0.0065 | 0.0061 | 0.0070  |       |
| 2  | State     | 0.0014       | 0.0004  | 0.0023 | 0.0069  | -0.0007             |               |         | 0.0050 | 0.0046 | 0.0053  |       |
| 3  | State     | 0.0003       | -0.0015 | 0.0021 | 0.7370  | -0.0002             |               |         | 0.0093 | 0.0086 | 0.0099  |       |
| 4  | State     | 0.0025       | 0.0013  | 0.0037 | 0.0000  | -0.0013             |               |         | 0.0061 | 0.0057 | 0.0065  |       |
| 5  | State     | 0.0010       | -0.0002 | 0.0022 | 0.0911  | -0.0005             |               |         | 0.0060 | 0.0056 | 0.0065  |       |
| 6  | State     | 0.0000       | -0.0016 | 0.0016 | 0.9918  | 0.0000              |               |         | 0.0081 | 0.0075 | 0.0086  |       |
| 7  | State     | 0.0009       | -0.0001 | 0.0019 | 0.0691  | -0.0004             |               |         | 0.0049 | 0.0046 | 0.0053  |       |
| 8  | State     | 0.0000       | -0.0011 | 0.0012 | 0.9601  | 0.0000              |               |         | 0.0058 | 0.0054 | 0.0062  |       |
| 9  | State     | 0.0001       | -0.0010 | 0.0013 | 0.8048  | -0.0001             |               |         | 0.0057 | 0.0053 | 0.0061  |       |
| 10 | State     | 0.0016       | 0.0002  | 0.0029 | 0.0217  | -0.0008             |               |         | 0.0067 | 0.0063 | 0.0072  |       |
| 11 | State     | 0.0015       | 0.0005  | 0.0025 | 0.0039  | -0.0007             |               |         | 0.0051 | 0.0047 | 0.0054  |       |
| 12 | State     | -0.0005      | -0.0016 | 0.0006 | 0.3553  | 0.0003              |               |         | 0.0056 | 0.0052 | 0.0060  |       |
| 13 | State     | 0.0010       | 0.0000  | 0.0020 | 0.0404  | -0.0005             |               |         | 0.0051 | 0.0047 | 0.0054  |       |
| 14 | State     | 0.0008       | -0.0001 | 0.0018 | 0.0807  | -0.0004             |               |         | 0.0048 | 0.0045 | 0.0052  |       |
| 15 | State     | 0.0004       | -0.0006 | 0.0015 | 0.4350  | -0.0002             |               |         | 0.0053 | 0.0049 | 0.0056  |       |
| 16 | State     | 0.0004       | -0.0006 | 0.0014 | 0.4003  | -0.0002             |               |         | 0.0050 | 0.0047 | 0.0054  |       |
| 17 | State     | 0.0008       | -0.0002 | 0.0018 | 0.1264  | -0.0004             |               |         | 0.0050 | 0.0046 | 0.0053  |       |

SD: standard deviation, CI: confident interval, the state consists of the rest state and task state, The value of the rest state is 0, and the value of the task state is 1, df = 18 (the number of period) \*22 (the number of participant) -2 (the number of estimated variable) = 394, Significance is identified by CI not including 0 and p-value < 0.05, Red shade means that identified significance exists in all wavelength data. There is no random effect.

**Table S11.** Signal amplitude ~ State+(1|subject) , 805 nm optical density data statistical results.

| CH | Parameter | Fixed effect |         |        |         | Estimated intercept | Random effect |         |        | Error  |         |       |
|----|-----------|--------------|---------|--------|---------|---------------------|---------------|---------|--------|--------|---------|-------|
|    |           | Effect size  | CI(95%) |        | p-value |                     | SD            | CI(95%) |        | SD     | CI(95%) |       |
|    |           |              | Lower   | Upper  |         |                     |               | Lower   | Upper  |        | Lower   | Upper |
| 1  | State     | 0.0038       | 0.0024  | 0.0052 | 0.0000  | -0.0019             |               |         | 0.0069 | 0.0065 | 0.0074  |       |
| 2  | State     | 0.0030       | 0.0020  | 0.0041 | 0.0000  | -0.0015             |               |         | 0.0053 | 0.0050 | 0.0057  |       |
| 3  | State     | 0.0022       | 0.0003  | 0.0040 | 0.0208  | -0.0011             |               |         | 0.0093 | 0.0087 | 0.0100  |       |
| 4  | State     | 0.0040       | 0.0027  | 0.0054 | 0.0000  | -0.0020             |               |         | 0.0068 | 0.0064 | 0.0073  |       |
| 5  | State     | 0.0028       | 0.0015  | 0.0041 | 0.0000  | -0.0013             |               |         | 0.0066 | 0.0062 | 0.0071  |       |
| 6  | State     | 0.0027       | 0.0012  | 0.0043 | 0.0005  | -0.0014             |               |         | 0.0077 | 0.0072 | 0.0083  |       |
| 7  | State     | 0.0013       | 0.0003  | 0.0023 | 0.0137  | -0.0006             |               |         | 0.0052 | 0.0049 | 0.0056  |       |
| 8  | State     | 0.0011       | -0.0002 | 0.0023 | 0.0902  | -0.0005             |               |         | 0.0063 | 0.0058 | 0.0067  |       |
| 9  | State     | 0.0019       | 0.0007  | 0.0031 | 0.0023  | -0.0009             |               |         | 0.0061 | 0.0057 | 0.0065  |       |
| 10 | State     | 0.0020       | 0.0006  | 0.0034 | 0.0055  | -0.0010             |               |         | 0.0070 | 0.0065 | 0.0075  |       |
| 11 | State     | 0.0024       | 0.0013  | 0.0035 | 0.0000  | -0.0012             |               |         | 0.0054 | 0.0051 | 0.0058  |       |
| 12 | State     | 0.0005       | -0.0008 | 0.0017 | 0.4597  | -0.0002             |               |         | 0.0062 | 0.0058 | 0.0067  |       |
| 13 | State     | 0.0025       | 0.0014  | 0.0036 | 0.0000  | -0.0012             |               |         | 0.0057 | 0.0053 | 0.0061  |       |
| 14 | State     | 0.0011       | 0.0001  | 0.0021 | 0.0397  | -0.0005             |               |         | 0.0052 | 0.0048 | 0.0055  |       |
| 15 | State     | 0.0012       | 0.0000  | 0.0023 | 0.0445  | -0.0006             |               |         | 0.0058 | 0.0054 | 0.0062  |       |
| 16 | State     | 0.0015       | 0.0003  | 0.0026 | 0.0108  | -0.0007             |               |         | 0.0057 | 0.0054 | 0.0062  |       |
| 17 | State     | 0.0020       | 0.0009  | 0.0032 | 0.0004  | -0.0010             |               |         | 0.0057 | 0.0053 | 0.0061  |       |

SD: standard deviation, CI: confident interval, the state consists of the rest state and task state, The value of the rest state is 0, and the value of the task state is 1, df = 18 (the number of period) \*22 (the number of participant) -2 (the number of estimated variable) = 394, Significance is identified by CI not including 0 and p-value < 0.05, Blue shade means that identified significance exists not only in this 805 nm wavelength data but also in 830nm wavelength data, Red shade means that identified significance exists in all wavelength data. There is no random effect.

**Table S12.** Signal amplitude ~ State+(1|subject) , 830 nm optical density data statistical results.

| CH | Parameter | Fixed effect |         |        |         | Estimated intercept | Random effect |         |        | Error  |         |       |
|----|-----------|--------------|---------|--------|---------|---------------------|---------------|---------|--------|--------|---------|-------|
|    |           | Effect size  | CI(95%) |        | p-value |                     | SD            | CI(95%) |        | SD     | CI(95%) |       |
|    |           |              | Lower   | Upper  |         |                     |               | Lower   | Upper  |        | Lower   | Upper |
| 1  | State     | 0.0045       | 0.0030  | 0.0060 | 0.0000  | -0.0022             |               |         | 0.0077 | 0.0071 | 0.0082  |       |
| 2  | State     | 0.0036       | 0.0025  | 0.0048 | 0.0000  | -0.0018             |               |         | 0.0058 | 0.0054 | 0.0062  |       |
| 3  | State     | 0.0028       | 0.0009  | 0.0046 | 0.0038  | -0.0014             |               |         | 0.0094 | 0.0088 | 0.0101  |       |
| 4  | State     | 0.0045       | 0.0030  | 0.0060 | 0.0000  | -0.0022             |               |         | 0.0077 | 0.0072 | 0.0082  |       |
| 5  | State     | 0.0035       | 0.0021  | 0.0049 | 0.0000  | -0.0017             |               |         | 0.0070 | 0.0066 | 0.0075  |       |
| 6  | State     | 0.0032       | 0.0016  | 0.0048 | 0.0001  | -0.0016             |               |         | 0.0080 | 0.0074 | 0.0086  |       |

|    |       |        |         |        |        |         |  |        |        |        |
|----|-------|--------|---------|--------|--------|---------|--|--------|--------|--------|
| 7  | State | 0.0017 | 0.0005  | 0.0028 | 0.0043 | -0.0008 |  | 0.0057 | 0.0053 | 0.0061 |
| 8  | State | 0.0014 | 0.0001  | 0.0027 | 0.0361 | -0.0007 |  | 0.0066 | 0.0062 | 0.0071 |
| 9  | State | 0.0024 | 0.0011  | 0.0037 | 0.0004 | -0.0012 |  | 0.0066 | 0.0062 | 0.0071 |
| 10 | State | 0.0024 | 0.0009  | 0.0039 | 0.0013 | -0.0012 |  | 0.0074 | 0.0069 | 0.0079 |
| 11 | State | 0.0027 | 0.0016  | 0.0039 | 0.0000 | -0.0013 |  | 0.0059 | 0.0055 | 0.0063 |
| 12 | State | 0.0007 | -0.0006 | 0.0021 | 0.2655 | -0.0004 |  | 0.0066 | 0.0062 | 0.0071 |
| 13 | State | 0.0028 | 0.0016  | 0.0040 | 0.0000 | -0.0014 |  | 0.0062 | 0.0058 | 0.0066 |
| 14 | State | 0.0013 | 0.0002  | 0.0024 | 0.0226 | -0.0006 |  | 0.0056 | 0.0053 | 0.0060 |
| 15 | State | 0.0014 | 0.0002  | 0.0026 | 0.0243 | -0.0007 |  | 0.0062 | 0.0058 | 0.0067 |
| 16 | State | 0.0018 | 0.0006  | 0.0030 | 0.0033 | -0.0009 |  | 0.0061 | 0.0057 | 0.0065 |
| 17 | State | 0.0022 | 0.0010  | 0.0034 | 0.0003 | -0.0011 |  | 0.0061 | 0.0057 | 0.0066 |

SD: standard deviation, CI: confident interval, the state consists of the rest state and task state, The value of the rest state is 0, and the value of the task state is 1, df = 18 (the number of period) \*22 (the number of participant) -2 (the number of estimated variable) = 394, Significance is identified by CI not including 0 and p-value < 0.05, Gray shade means that identified significance exists only in this 830 nm wavelength data, Blue shade means that identified significance exists not only in this 830 nm wavelength data but also in 805nm wavelength data, Red shade means that identified significance exists in all wavelength density data. There is no random effect.

**Table S13.** Signal amplitude~ Rest duration+ (1|subject) , 780 nm optical density data statistical results.

| CH | Parameter | Fixed effect |         |        |         | Estimated intercept | Random effect |         |        | Error  |         |       |
|----|-----------|--------------|---------|--------|---------|---------------------|---------------|---------|--------|--------|---------|-------|
|    |           | Effect size* | CI(95%) |        | p-value |                     | SD            | CI(95%) |        | SD     | CI(95%) |       |
|    |           |              | Lower*  | Upper* |         |                     |               | Lower   | Upper  |        | Lower   | Upper |
| 1  | RD        | -0.1302      | -0.3139 | 0.0535 | 0.1637  | -0.0001             |               |         | 0.0068 | 0.0061 | 0.0075  |       |
| 2  | RD        | -0.0782      | -0.2200 | 0.0636 | 0.2780  | 0.0000              |               |         | 0.0052 | 0.0047 | 0.0058  |       |
| 3  | RD        | -0.0899      | -0.3750 | 0.1952 | 0.5347  | 0.0006              |               |         | 0.0105 | 0.0095 | 0.0116  |       |
| 4  | RD        | -0.0720      | -0.2470 | 0.1029 | 0.4178  | -0.0006             |               |         | 0.0064 | 0.0058 | 0.0071  |       |
| 5  | RD        | -0.1025      | -0.2678 | 0.0629 | 0.2232  | 0.0004              |               |         | 0.0061 | 0.0055 | 0.0067  |       |
| 6  | RD        | -0.1488      | -0.3966 | 0.0991 | 0.2379  | 0.0013              |               |         | 0.0091 | 0.0083 | 0.0101  |       |
| 7  | RD        | -0.0574      | -0.1982 | 0.0833 | 0.4220  | 0.0001              |               |         | 0.0052 | 0.0047 | 0.0057  |       |
| 8  | RD        | -0.1272      | -0.2841 | 0.0297 | 0.1114  | 0.0011              |               |         | 0.0058 | 0.0052 | 0.0064  |       |
| 9  | RD        | -0.1455      | -0.3064 | 0.0154 | 0.0761  | 0.0012              |               |         | 0.0059 | 0.0054 | 0.0065  |       |
| 10 | RD        | -0.1239      | -0.3315 | 0.0837 | 0.2405  | 0.0003              |               |         | 0.0076 | 0.0069 | 0.0084  |       |
| 11 | RD        | -0.0850      | -0.2239 | 0.0539 | 0.2288  | 0.0000              |               |         | 0.0051 | 0.0046 | 0.0056  |       |
| 12 | RD        | -0.1054      | -0.2577 | 0.0469 | 0.1740  | 0.0012              |               |         | 0.0056 | 0.0051 | 0.0062  |       |
| 13 | RD        | -0.1114      | -0.2550 | 0.0322 | 0.1275  | 0.0005              |               |         | 0.0053 | 0.0048 | 0.0058  |       |
| 14 | RD        | -0.0544      | -0.1927 | 0.0839 | 0.4388  | 0.0001              |               |         | 0.0051 | 0.0046 | 0.0056  |       |
| 15 | RD        | -0.0696      | -0.2164 | 0.0772 | 0.3511  | 0.0004              |               |         | 0.0054 | 0.0049 | 0.0060  |       |
| 16 | RD        | -0.0391      | -0.1806 | 0.1024 | 0.5865  | 0.0002              |               |         | 0.0052 | 0.0047 | 0.0058  |       |
| 17 | RD        | -0.0399      | -0.1800 | 0.1003 | 0.5755  | 0.0000              |               |         | 0.0052 | 0.0047 | 0.0057  |       |

RD: rest duration, \* :  $\times 10^{-3}$ , SD: standard deviation, CI: confident interval, Signal amplitude calculated from the rest state only, df = 9 (the number of period) \*22 (the number of participant) -2 (the number of estimated variable) = 196, Significance is identified by CI not including 0 and p-value < 0.05, There is no random effect.

**Table S14.** Signal amplitude~ Rest duration+ (1|subject) , 805 nm optical density data statistical results.

| CH | Parameter | Fixed effect |         |        |         | Estimated intercept | Random effect |         |        | Error  |         |       |
|----|-----------|--------------|---------|--------|---------|---------------------|---------------|---------|--------|--------|---------|-------|
|    |           | Effect size* | CI(95%) |        | p-value |                     | SD            | CI(95%) |        | SD     | CI(95%) |       |
|    |           |              | Lower*  | Upper* |         |                     |               | Lower   | Upper  |        | Lower   | Upper |
| 1  | RD        | -0.0968      | -0.2922 | 0.0985 | 0.3293  | -0.0010             |               |         | 0.0072 | 0.0065 | 0.0079  |       |
| 2  | RD        | -0.0666      | -0.2105 | 0.0774 | 0.3631  | -0.0009             |               |         | 0.0053 | 0.0048 | 0.0059  |       |
| 3  | RD        | -0.0950      | -0.3814 | 0.1915 | 0.5140  | -0.0002             |               |         | 0.0106 | 0.0096 | 0.0116  |       |
| 4  | RD        | -0.0493      | -0.2423 | 0.1438 | 0.6151  | -0.0015             |               |         | 0.0071 | 0.0064 | 0.0078  |       |
| 5  | RD        | -0.0906      | -0.2700 | 0.0888 | 0.3204  | -0.0005             |               |         | 0.0066 | 0.0060 | 0.0073  |       |
| 6  | RD        | -0.1489      | -0.3807 | 0.0829 | 0.2068  | 0.0000              |               |         | 0.0085 | 0.0077 | 0.0094  |       |
| 7  | RD        | -0.0593      | -0.2089 | 0.0904 | 0.4357  | -0.0001             |               |         | 0.0055 | 0.0050 | 0.0061  |       |
| 8  | RD        | -0.1124      | -0.2826 | 0.0578 | 0.1944  | 0.0005              |               |         | 0.0063 | 0.0057 | 0.0069  |       |
| 9  | RD        | -0.1208      | -0.2923 | 0.0506 | 0.1662  | 0.0002              |               |         | 0.0063 | 0.0057 | 0.0070  |       |
| 10 | RD        | -0.1052      | -0.3202 | 0.1098 | 0.3357  | 0.0000              |               |         | 0.0079 | 0.0072 | 0.0087  |       |
| 11 | RD        | -0.0799      | -0.2306 | 0.0709 | 0.2973  | -0.0005             |               |         | 0.0056 | 0.0050 | 0.0061  |       |
| 12 | RD        | -0.0944      | -0.2659 | 0.0771 | 0.2790  | 0.0006              |               |         | 0.0063 | 0.0057 | 0.0070  |       |
| 13 | RD        | -0.0935      | -0.2513 | 0.0643 | 0.2442  | -0.0004             |               |         | 0.0058 | 0.0053 | 0.0064  |       |
| 14 | RD        | -0.0548      | -0.2018 | 0.0922 | 0.4632  | 0.0000              |               |         | 0.0054 | 0.0049 | 0.0060  |       |
| 15 | RD        | -0.0444      | -0.2096 | 0.1207 | 0.5964  | -0.0002             |               |         | 0.0061 | 0.0055 | 0.0067  |       |
| 16 | RD        | -0.0218      | -0.1810 | 0.1373 | 0.7868  | -0.0005             |               |         | 0.0059 | 0.0053 | 0.0065  |       |
| 17 | RD        | -0.0522      | -0.2077 | 0.1034 | 0.5090  | -0.0005             |               |         | 0.0057 | 0.0052 | 0.0063  |       |

RD: rest duration,  $\bullet^* : \times 10^{-3}$ , SD: standard deviation, CI: confident interval, Signal amplitude calculated from the rest state only, df = 9 (the number of period) \*22 (the number of participant) -2 (the number of estimated variable) = 196, Significance is identified by CI not including 0 and p-value < 0.05, There is no random effect.

**Table S15.** Signal amplitude~ Rest duration+ (1|subject) , 830 nm optical density data statistical results.

| CH | Parameter | Fixed effect |         |        |         | Estimated intercept | Random effect |         |        | Error  |         |       |
|----|-----------|--------------|---------|--------|---------|---------------------|---------------|---------|--------|--------|---------|-------|
|    |           | Effect size* | CI(95%) |        | p-value |                     | SD            | CI(95%) |        | SD     | CI(95%) |       |
|    |           |              | Lower*  | Upper* |         |                     |               | Lower   | Upper  |        | Lower   | Upper |
| 1  | RD        | -0.0998      | -0.3130 | 0.1134 | 0.3572  | -0.0013             |               |         | 0.0079 | 0.0071 | 0.0087  |       |
| 2  | RD        | -0.0771      | -0.2332 | 0.0790 | 0.3313  | -0.0011             |               |         | 0.0058 | 0.0052 | 0.0063  |       |
| 3  | RD        | -0.1047      | -0.3930 | 0.1836 | 0.4747  | -0.0004             |               |         | 0.0106 | 0.0096 | 0.0117  |       |
| 4  | RD        | -0.0493      | -0.2649 | 0.1664 | 0.6528  | -0.0018             |               |         | 0.0079 | 0.0072 | 0.0088  |       |
| 5  | RD        | -0.0913      | -0.2800 | 0.0974 | 0.3413  | -0.0009             |               |         | 0.0070 | 0.0063 | 0.0077  |       |
| 6  | RD        | -0.1467      | -0.3845 | 0.0911 | 0.2252  | -0.0003             |               |         | 0.0088 | 0.0079 | 0.0097  |       |
| 7  | RD        | -0.0555      | -0.2185 | 0.1075 | 0.5026  | -0.0003             |               |         | 0.0060 | 0.0054 | 0.0066  |       |
| 8  | RD        | -0.1042      | -0.2830 | 0.0746 | 0.2519  | 0.0003              |               |         | 0.0066 | 0.0060 | 0.0073  |       |
| 9  | RD        | -0.1187      | -0.3054 | 0.0680 | 0.2114  | -0.0001             |               |         | 0.0069 | 0.0062 | 0.0076  |       |
| 10 | RD        | -0.1043      | -0.3253 | 0.1167 | 0.3532  | -0.0002             |               |         | 0.0081 | 0.0074 | 0.0090  |       |
| 11 | RD        | -0.0780      | -0.2417 | 0.0858 | 0.3489  | -0.0006             |               |         | 0.0060 | 0.0055 | 0.0067  |       |
| 12 | RD        | -0.0824      | -0.2654 | 0.1005 | 0.3753  | 0.0004              |               |         | 0.0067 | 0.0061 | 0.0074  |       |
| 13 | RD        | -0.0826      | -0.2517 | 0.0865 | 0.3365  | -0.0006             |               |         | 0.0062 | 0.0056 | 0.0069  |       |
| 14 | RD        | -0.0420      | -0.2005 | 0.1165 | 0.6022  | -0.0003             |               |         | 0.0058 | 0.0053 | 0.0064  |       |
| 15 | RD        | -0.0448      | -0.2218 | 0.1323 | 0.6186  | -0.0003             |               |         | 0.0065 | 0.0059 | 0.0072  |       |
| 16 | RD        | -0.0183      | -0.1858 | 0.1493 | 0.8301  | -0.0007             |               |         | 0.0062 | 0.0056 | 0.0068  |       |
| 17 | RD        | -0.0529      | -0.2188 | 0.1130 | 0.5303  | -0.0006             |               |         | 0.0061 | 0.0055 | 0.0067  |       |

RD: rest duration,  $\bullet^* : \times 10^{-3}$ , SD: standard deviation, CI: confident interval, Signal amplitude calculated from the rest state only, df = 9 (the number of period) \*22 (the number of participant) -2 (the number of estimated variable) = 196, Significance is identified by CI not including 0 and p-value < 0.05, There is no random effect

**Table S16.** Signal amplitude ~ Task duration+ $\omega_n + \zeta$ +(1|subject) , 780 nm optical density data statistical results.

| CH | Parameter | Fixed effect |         |        |         | Estimated intercept | Random effect |         |        | Error  |         |        |
|----|-----------|--------------|---------|--------|---------|---------------------|---------------|---------|--------|--------|---------|--------|
|    |           | Effect size  | CI(95%) |        | p-value |                     | SD            | CI(95%) |        | SD     | CI(95%) |        |
|    |           |              | Lower   | Upper  |         |                     |               | Lower   | Upper  |        | Lower   | Upper  |
| 1  | NF        | 0.0006       | 0.0000  | 0.0011 | 0.0385  | -0.0008             |               |         |        | 0.0061 | 0.0055  | 0.0067 |
|    | DR        | 0.0000       | -0.0021 | 0.0021 | 0.9937  |                     |               |         |        |        |         |        |
|    | TD        | 0.0000       | -0.0001 | 0.0002 | 0.6178  |                     |               |         |        |        |         |        |
| 2  | NF        | 0.0004       | 0.0000  | 0.0008 | 0.0483  | -0.0004             |               |         |        | 0.0046 | 0.0042  | 0.0051 |
|    | DR        | -0.0004      | -0.0020 | 0.0012 | 0.6197  |                     |               |         |        |        |         |        |
|    | TD        | 0.0000       | -0.0001 | 0.0002 | 0.7174  |                     |               |         |        |        |         |        |
| 3  | NF        | 0.0004       | -0.0001 | 0.0010 | 0.1433  | -0.0004             | 0.0041        | 0.0028  | 0.0060 | 0.0066 | 0.0060  | 0.0074 |
|    | DR        | -0.0010      | -0.0033 | 0.0013 | 0.3840  |                     |               |         |        |        |         |        |
|    | TD        | 0.0000       | -0.0002 | 0.0002 | 0.8093  |                     |               |         |        |        |         |        |
| 4  | NF        | 0.0007       | 0.0002  | 0.0012 | 0.0055  | -0.0001             |               |         |        | 0.0056 | 0.0051  | 0.0062 |
|    | DR        | -0.0005      | -0.0024 | 0.0014 | 0.6045  |                     |               |         |        |        |         |        |
|    | TD        | 0.0000       | -0.0002 | 0.0001 | 0.7815  |                     |               |         |        |        |         |        |
| 5  | NF        | 0.0008       | 0.0003  | 0.0013 | 0.0025  | -0.0024             |               |         |        | 0.0058 | 0.0052  | 0.0064 |
|    | DR        | 0.0001       | -0.0018 | 0.0021 | 0.8886  |                     |               |         |        |        |         |        |
|    | TD        | 0.0000       | -0.0001 | 0.0002 | 0.6266  |                     |               |         |        |        |         |        |
| 6  | NF        | 0.0004       | -0.0001 | 0.0009 | 0.1304  | -0.0020             | 0.0037        | 0.0025  | 0.0053 | 0.0056 | 0.0050  | 0.0062 |
|    | DR        | -0.0003      | -0.0022 | 0.0017 | 0.7854  |                     |               |         |        |        |         |        |
|    | TD        | 0.0001       | 0.0000  | 0.0003 | 0.1646  |                     |               |         |        |        |         |        |
| 7  | NF        | 0.0007       | 0.0003  | 0.0010 | 0.0002  | -0.0008             | 0.0020        | 0.0013  | 0.0031 | 0.0040 | 0.0036  | 0.0044 |
|    | DR        | -0.0007      | -0.0021 | 0.0007 | 0.3211  |                     |               |         |        |        |         |        |
|    | TD        | 0.0000       | -0.0001 | 0.0001 | 0.9532  |                     |               |         |        |        |         |        |
| 8  | NF        | 0.0008       | 0.0003  | 0.0013 | 0.0012  | -0.0030             |               |         |        | 0.0056 | 0.0051  | 0.0062 |
|    | DR        | -0.0001      | -0.0021 | 0.0018 | 0.8940  |                     |               |         |        |        |         |        |
|    | TD        | 0.0001       | -0.0001 | 0.0002 | 0.3535  |                     |               |         |        |        |         |        |
| 9  | NF        | 0.0007       | 0.0003  | 0.0011 | 0.0005  | -0.0046             | 0.0021        | 0.0013  | 0.0033 | 0.0047 | 0.0043  | 0.0052 |
|    | DR        | 0.0015       | -0.0001 | 0.0031 | 0.0718  |                     |               |         |        |        |         |        |
|    | TD        | 0.0001       | 0.0000  | 0.0002 | 0.1313  |                     |               |         |        |        |         |        |
| 10 | NF        | 0.0009       | 0.0004  | 0.0013 | 0.0005  | -0.0014             |               |         |        | 0.0054 | 0.0049  | 0.0060 |
|    | DR        | -0.0007      | -0.0026 | 0.0011 | 0.4494  |                     |               |         |        |        |         |        |
|    | TD        | 0.0000       | -0.0001 | 0.0002 | 0.6360  |                     |               |         |        |        |         |        |
| 11 | NF        | 0.0007       | 0.0003  | 0.0011 | 0.0016  | -0.0023             |               |         |        | 0.0048 | 0.0044  | 0.0053 |
|    | DR        | 0.0008       | -0.0009 | 0.0025 | 0.3375  |                     |               |         |        |        |         |        |
|    | TD        | 0.0000       | -0.0001 | 0.0001 | 0.8275  |                     |               |         |        |        |         |        |
| 12 | NF        | 0.0010       | 0.0006  | 0.0014 | 0.0000  | -0.0047             | 0.0022        | 0.0014  | 0.0035 | 0.0047 | 0.0042  | 0.0052 |
|    | DR        | 0.0008       | -0.0008 | 0.0024 | 0.3002  |                     |               |         |        |        |         |        |



|    |    |         |         |        |        |         |        |        |        |        |        |        |
|----|----|---------|---------|--------|--------|---------|--------|--------|--------|--------|--------|--------|
| 13 | TD | 0.0001  | -0.0001 | 0.0002 | 0.4218 | -0.0038 |        |        |        | 0.0045 | 0.0041 | 0.0050 |
|    | NF | 0.0009  | 0.0005  | 0.0013 | 0.0000 |         |        |        |        |        |        |        |
|    | DR | 0.0012  | -0.0004 | 0.0027 | 0.1354 |         |        |        |        |        |        |        |
|    | TD | 0.0000  | -0.0001 | 0.0002 | 0.5621 |         |        |        |        |        |        |        |
| 14 | NF | 0.0006  | 0.0003  | 0.0010 | 0.0010 | -0.0011 |        |        |        | 0.0044 | 0.0040 | 0.0048 |
|    | DR | -0.0004 | -0.0019 | 0.0011 | 0.6121 |         |        |        |        |        |        |        |
|    | TD | 0.0000  | -0.0001 | 0.0001 | 0.9852 |         |        |        |        |        |        |        |
|    | NF | 0.0009  | 0.0004  | 0.0013 | 0.0001 |         |        |        |        |        |        |        |
| 15 | DR | 0.0004  | -0.0013 | 0.0021 | 0.6140 | -0.0029 |        |        |        | 0.0049 | 0.0044 | 0.0054 |
|    | TD | 0.0000  | -0.0001 | 0.0001 | 0.9227 |         |        |        |        |        |        |        |
|    | NF | 0.0012  | 0.0008  | 0.0016 | 0.0000 |         |        |        |        |        |        |        |
|    | DR | 0.0012  | -0.0003 | 0.0027 | 0.1245 |         |        |        |        |        |        |        |
| 16 | TD | 0.0000  | -0.0002 | 0.0001 | 0.5869 | -0.0041 |        |        |        | 0.0044 | 0.0040 | 0.0049 |
|    | NF | 0.0010  | 0.0006  | 0.0013 | 0.0000 |         |        |        |        |        |        |        |
|    | DR | 0.0009  | -0.0005 | 0.0023 | 0.2160 |         |        |        |        |        |        |        |
|    | TD | 0.0000  | -0.0001 | 0.0001 | 0.6127 |         |        |        |        |        |        |        |
| 17 | NF | 0.0010  | 0.0006  | 0.0013 | 0.0000 | -0.0032 | 0.0018 | 0.0012 | 0.0029 | 0.0041 | 0.0037 | 0.0046 |
|    | DR | 0.0009  | -0.0005 | 0.0023 | 0.2160 |         |        |        |        |        |        |        |
|    | TD | 0.0000  | -0.0001 | 0.0001 | 0.6127 |         |        |        |        |        |        |        |
|    | NF | 0.0009  | 0.0005  | 0.0013 | 0.0000 |         |        |        |        |        |        |        |

**Table S17.** Signal amplitude  $\sim$  Task duration +  $\omega_n + \zeta + (1|\text{subject})$  , 805 nm optical density data statistical results.

| CH | Parameter | Fixed effect |         |        |         | Estimated intercept | Random effect |         |        |        | Error   |        |  |
|----|-----------|--------------|---------|--------|---------|---------------------|---------------|---------|--------|--------|---------|--------|--|
|    |           | Effect size  | CI(95%) |        | p-value |                     | SD            | CI(95%) |        | SD     | CI(95%) |        |  |
|    |           |              | Lower   | Upper  |         |                     |               | Lower   | Upper  |        | Lower   | Upper  |  |
| 1  | NF        | 0.0009       | 0.0003  | 0.0014 | 0.0036  | 0.0006              |               |         |        | 0.0065 | 0.0059  | 0.0072 |  |
|    | DR        | -0.0009      | -0.0032 | 0.0013 | 0.4132  |                     |               |         |        |        |         |        |  |
|    | TD        | 0.0000       | -0.0002 | 0.0002 | 0.7919  |                     |               |         |        |        |         |        |  |
| 2  | NF        | 0.0008       | 0.0003  | 0.0012 | 0.0006  | 0.0009              |               |         |        | 0.0051 | 0.0046  | 0.0057 |  |
|    | DR        | -0.0013      | -0.0031 | 0.0004 | 0.1329  |                     |               |         |        |        |         |        |  |
|    | TD        | 0.0000       | -0.0002 | 0.0001 | 0.5723  |                     |               |         |        |        |         |        |  |
| 3  | NF        | 0.0007       | 0.0001  | 0.0013 | 0.0227  | 0.0013              | 0.0037        | 0.0025  | 0.0056 | 0.0068 | 0.0062  | 0.0076 |  |
|    | DR        | -0.0021      | -0.0044 | 0.0003 | 0.0816  |                     |               |         |        |        |         |        |  |
|    | TD        | 0.0000       | -0.0002 | 0.0002 | 0.8082  |                     |               |         |        |        |         |        |  |
| 4  | NF        | 0.0008       | 0.0003  | 0.0014 | 0.0037  | 0.0017              |               |         |        | 0.0064 | 0.0058  | 0.0070 |  |
|    | DR        | -0.0014      | -0.0036 | 0.0008 | 0.2148  |                     |               |         |        |        |         |        |  |
|    | TD        | -0.0001      | -0.0002 | 0.0001 | 0.4139  |                     |               |         |        |        |         |        |  |
| 5  | NF        | 0.0011       | 0.0006  | 0.0017 | 0.0001  | -0.0012             |               |         |        | 0.0063 | 0.0058  | 0.0070 |  |
|    | DR        | -0.0007      | -0.0029 | 0.0015 | 0.5458  |                     |               |         |        |        |         |        |  |
|    | TD        | 0.0000       | -0.0002 | 0.0002 | 0.8257  |                     |               |         |        |        |         |        |  |
| 6  | NF        | 0.0007       | 0.0002  | 0.0012 | 0.0083  | 0.0001              | 0.0029        | 0.0019  | 0.0045 | 0.0060 | 0.0054  | 0.0066 |  |
|    | DR        | -0.0012      | -0.0033 | 0.0008 | 0.2355  |                     |               |         |        |        |         |        |  |
|    | TD        | 0.0000       | -0.0001 | 0.0002 | 0.6457  |                     |               |         |        |        |         |        |  |
| 7  | NF        | 0.0007       | 0.0004  | 0.0011 | 0.0001  | -0.0004             | 0.0022        | 0.0015  | 0.0034 | 0.0042 | 0.0038  | 0.0047 |  |
|    | DR        | -0.0010      | -0.0025 | 0.0005 | 0.1752  |                     |               |         |        |        |         |        |  |
|    | TD        | 0.0000       | -0.0001 | 0.0001 | 0.8244  |                     |               |         |        |        |         |        |  |
| 8  | NF        | 0.0011       | 0.0006  | 0.0016 | 0.0000  | -0.0022             |               |         |        | 0.0059 | 0.0054  | 0.0066 |  |
|    | DR        | -0.0008      | -0.0029 | 0.0012 | 0.4309  |                     |               |         |        |        |         |        |  |
|    | TD        | 0.0000       | -0.0001 | 0.0002 | 0.7573  |                     |               |         |        |        |         |        |  |
| 9  | NF        | 0.0011       | 0.0006  | 0.0015 | 0.0000  | -0.0031             | 0.0024        | 0.0015  | 0.0037 | 0.0050 | 0.0045  | 0.0055 |  |
|    | DR        | 0.0005       | -0.0012 | 0.0023 | 0.5286  |                     |               |         |        |        |         |        |  |
|    | TD        | 0.0000       | -0.0001 | 0.0002 | 0.6496  |                     |               |         |        |        |         |        |  |
| 10 | NF        | 0.0009       | 0.0004  | 0.0014 | 0.0006  | -0.0009             |               |         |        | 0.0057 | 0.0052  | 0.0063 |  |
|    | DR        | -0.0009      | -0.0029 | 0.0011 | 0.3719  |                     |               |         |        |        |         |        |  |
|    | TD        | 0.0000       | -0.0001 | 0.0002 | 0.8902  |                     |               |         |        |        |         |        |  |
| 11 | NF        | 0.0009       | 0.0004  | 0.0013 | 0.0001  | -0.0018             |               |         |        | 0.0051 | 0.0046  | 0.0056 |  |
|    | DR        | 0.0004       | -0.0013 | 0.0022 | 0.6244  |                     |               |         |        |        |         |        |  |
|    | TD        | 0.0000       | -0.0002 | 0.0001 | 0.8304  |                     |               |         |        |        |         |        |  |
| 12 | NF        | 0.0013       | 0.0008  | 0.0017 | 0.0000  | -0.0041             | 0.0024        | 0.0015  | 0.0038 | 0.0052 | 0.0047  | 0.0058 |  |
|    | DR        | 0.0004       | -0.0014 | 0.0022 | 0.6607  |                     |               |         |        |        |         |        |  |
|    | TD        | 0.0000       | -0.0001 | 0.0002 | 0.8992  |                     |               |         |        |        |         |        |  |
| 13 | NF        | 0.0012       | 0.0008  | 0.0017 | 0.0000  | -0.0025             |               |         |        | 0.0052 | 0.0047  | 0.0058 |  |
|    | DR        | 0.0003       | -0.0015 | 0.0021 | 0.7305  |                     |               |         |        |        |         |        |  |
|    | TD        | 0.0000       | -0.0002 | 0.0001 | 0.7545  |                     |               |         |        |        |         |        |  |
| 14 | NF        | 0.0007       | 0.0003  | 0.0011 | 0.0011  | -0.0007             |               |         |        | 0.0048 | 0.0043  | 0.0053 |  |
|    | DR        | -0.0007      | -0.0024 | 0.0009 | 0.3883  |                     |               |         |        |        |         |        |  |
|    | TD        | 0.0000       | -0.0001 | 0.0001 | 0.8345  |                     |               |         |        |        |         |        |  |
| 15 | NF        | 0.0011       | 0.0006  | 0.0016 | 0.0000  | -0.0024             |               |         |        | 0.0052 | 0.0048  | 0.0058 |  |
|    | DR        | 0.0001       | -0.0017 | 0.0019 | 0.8846  |                     |               |         |        |        |         |        |  |
|    | TD        | 0.0000       | -0.0002 | 0.0001 | 0.5489  |                     |               |         |        |        |         |        |  |
| 16 | NF        | 0.0014       | 0.0010  | 0.0019 | 0.0000  | -0.0037             |               |         |        | 0.0051 | 0.0046  | 0.0057 |  |
|    | DR        | 0.0010       | -0.0007 | 0.0028 | 0.2583  |                     |               |         |        |        |         |        |  |

|    |    |         |         |        |        |         |  |        |        |        |
|----|----|---------|---------|--------|--------|---------|--|--------|--------|--------|
| 17 | TD | -0.0001 | -0.0002 | 0.0001 | 0.2490 | -0.0028 |  | 0.0052 | 0.0047 | 0.0058 |
|    | NF | 0.0012  | 0.0008  | 0.0017 | 0.0000 |         |  |        |        |        |
|    | DR | 0.0007  | -0.0011 | 0.0025 | 0.4165 |         |  |        |        |        |
|    | TD | -0.0001 | -0.0002 | 0.0001 | 0.4512 |         |  |        |        |        |

NF: natural frequency, DR: damping ratio, TD: task duration, SD: standard deviation, CI: confident interval, df = 9 (the number of period) \*22 (the number of participant) -4 (the number of estimated variable) = 194, Significance is identified by CI not including 0 and p-value < 0.05, Gray shade means that identified significance exists only in this 805 nm wavelength data, Blue shade means that identified significance exists not only in this 805 nm wavelength data but also in 830nm wavelength data, Red shade means that identified significance exists in all wavelength data. Blank in random effect column means there is no random effect.

**Table S18.** Signal amplitude  $\sim$  Task duration +  $\omega_n + \zeta + (1|\text{subject})$ , 830 nm optical density data statistical results.

| CH | Parameter | Fixed effect |         |        |         | Estimated intercept | Random effect |         |        | Error  |         |        |
|----|-----------|--------------|---------|--------|---------|---------------------|---------------|---------|--------|--------|---------|--------|
|    |           | Effect size  | CI(95%) |        | p-value |                     | SD            | CI(95%) |        | SD     | CI(95%) |        |
|    |           |              | Lower   | Upper  |         |                     |               | Lower   | Upper  |        | Lower   | Upper  |
| 1  | NF        | 0.0010       | 0.0003  | 0.0016 | 0.0027  | 0.0008              |               |         |        | 0.0073 | 0.0066  | 0.0080 |
|    | DR        | -0.0010      | -0.0035 | 0.0015 | 0.4194  |                     |               |         |        |        |         |        |
|    | TD        | 0.0000       | -0.0002 | 0.0002 | 0.6729  |                     |               |         |        |        |         |        |
| 2  | NF        | 0.0010       | 0.0005  | 0.0015 | 0.0001  | 0.0006              |               |         |        | 0.0056 | 0.0050  | 0.0061 |
|    | DR        | -0.0013      | -0.0032 | 0.0006 | 0.1936  |                     |               |         |        |        |         |        |
|    | TD        | 0.0000       | -0.0002 | 0.0001 | 0.5622  |                     |               |         |        |        |         |        |
| 3  | NF        | 0.0008       | 0.0002  | 0.0014 | 0.0132  | 0.0015              | 0.0036        | 0.0023  | 0.0055 | 0.0071 | 0.0064  | 0.0079 |
|    | DR        | -0.0022      | -0.0046 | 0.0002 | 0.0766  |                     |               |         |        |        |         |        |
|    | TD        | 0.0000       | -0.0002 | 0.0002 | 0.7688  |                     |               |         |        |        |         |        |
| 4  | NF        | 0.0009       | 0.0003  | 0.0015 | 0.0054  | 0.0021              |               |         |        | 0.0072 | 0.0065  | 0.0080 |
|    | DR        | -0.0017      | -0.0042 | 0.0008 | 0.1814  |                     |               |         |        |        |         |        |
|    | TD        | -0.0001      | -0.0003 | 0.0001 | 0.3868  |                     |               |         |        |        |         |        |
| 5  | NF        | 0.0013       | 0.0007  | 0.0019 | 0.0000  | -0.0006             |               |         |        | 0.0068 | 0.0061  | 0.0075 |
|    | DR        | -0.0011      | -0.0034 | 0.0013 | 0.3653  |                     |               |         |        |        |         |        |
|    | TD        | 0.0000       | -0.0002 | 0.0001 | 0.6712  |                     |               |         |        |        |         |        |
| 6  | NF        | 0.0009       | 0.0003  | 0.0014 | 0.0024  | 0.0002              | 0.0029        | 0.0018  | 0.0046 | 0.0063 | 0.0057  | 0.0070 |
|    | DR        | -0.0014      | -0.0035 | 0.0008 | 0.2115  |                     |               |         |        |        |         |        |
|    | TD        | 0.0000       | -0.0002 | 0.0002 | 0.8456  |                     |               |         |        |        |         |        |
| 7  | NF        | 0.0008       | 0.0004  | 0.0012 | 0.0001  | 0.0000              | 0.0023        | 0.0015  | 0.0035 | 0.0047 | 0.0042  | 0.0052 |
|    | DR        | -0.0014      | -0.0030 | 0.0003 | 0.0990  |                     |               |         |        |        |         |        |
|    | TD        | 0.0000       | -0.0002 | 0.0001 | 0.6281  |                     |               |         |        |        |         |        |
| 8  | NF        | 0.0012       | 0.0006  | 0.0018 | 0.0000  | -0.0020             |               |         |        | 0.0064 | 0.0058  | 0.0070 |
|    | DR        | -0.0010      | -0.0032 | 0.0012 | 0.3749  |                     |               |         |        |        |         |        |
|    | TD        | 0.0000       | -0.0002 | 0.0002 | 0.9366  |                     |               |         |        |        |         |        |
| 9  | NF        | 0.0012       | 0.0007  | 0.0017 | 0.0000  | -0.0029             | 0.0024        | 0.0015  | 0.0039 | 0.0055 | 0.0050  | 0.0062 |
|    | DR        | 0.0005       | -0.0014 | 0.0024 | 0.6090  |                     |               |         |        |        |         |        |
|    | TD        | 0.0000       | -0.0001 | 0.0002 | 0.8728  |                     |               |         |        |        |         |        |
| 10 | NF        | 0.0010       | 0.0005  | 0.0016 | 0.0002  | -0.0006             |               |         |        | 0.0063 | 0.0057  | 0.0070 |
|    | DR        | -0.0012      | -0.0034 | 0.0009 | 0.2603  |                     |               |         |        |        |         |        |
|    | TD        | 0.0000       | -0.0002 | 0.0002 | 0.9081  |                     |               |         |        |        |         |        |
| 11 | NF        | 0.0010       | 0.0005  | 0.0014 | 0.0001  | -0.0015             |               |         |        | 0.0055 | 0.0050  | 0.0061 |
|    | DR        | 0.0003       | -0.0016 | 0.0022 | 0.7447  |                     |               |         |        |        |         |        |
|    | TD        | 0.0000       | -0.0002 | 0.0001 | 0.7160  |                     |               |         |        |        |         |        |
| 12 | NF        | 0.0014       | 0.0009  | 0.0019 | 0.0000  | -0.0040             | 0.0025        | 0.0016  | 0.0040 | 0.0056 | 0.0050  | 0.0062 |
|    | DR        | 0.0004       | -0.0015 | 0.0023 | 0.6864  |                     |               |         |        |        |         |        |
|    | TD        | 0.0000       | -0.0002 | 0.0001 | 0.8787  |                     |               |         |        |        |         |        |
| 13 | NF        | 0.0013       | 0.0008  | 0.0018 | 0.0000  | -0.0022             |               |         |        | 0.0058 | 0.0052  | 0.0064 |
|    | DR        | 0.0002       | -0.0018 | 0.0022 | 0.8604  |                     |               |         |        |        |         |        |
|    | TD        | 0.0000       | -0.0002 | 0.0001 | 0.6005  |                     |               |         |        |        |         |        |
| 14 | NF        | 0.0009       | 0.0004  | 0.0013 | 0.0003  | -0.0005             |               |         |        | 0.0052 | 0.0047  | 0.0058 |
|    | DR        | -0.0010      | -0.0028 | 0.0008 | 0.2671  |                     |               |         |        |        |         |        |
|    | TD        | 0.0000       | -0.0002 | 0.0001 | 0.6107  |                     |               |         |        |        |         |        |
| 15 | NF        | 0.0012       | 0.0007  | 0.0017 | 0.0000  | -0.0025             |               |         |        | 0.0056 | 0.0051  | 0.0062 |
|    | DR        | 0.0001       | -0.0018 | 0.0020 | 0.9073  |                     |               |         |        |        |         |        |
|    | TD        | 0.0000       | -0.0002 | 0.0001 | 0.5335  |                     |               |         |        |        |         |        |
| 16 | NF        | 0.0015       | 0.0010  | 0.0020 | 0.0000  | -0.0035             |               |         |        | 0.0055 | 0.0049  | 0.0060 |
|    | DR        | 0.0009       | -0.0010 | 0.0027 | 0.3692  |                     |               |         |        |        |         |        |
|    | TD        | -0.0001      | -0.0002 | 0.0001 | 0.2030  |                     |               |         |        |        |         |        |
| 17 | NF        | 0.0013       | 0.0008  | 0.0018 | 0.0000  | -0.0025             |               |         |        | 0.0057 | 0.0052  | 0.0063 |
|    | DR        | 0.0003       | -0.0016 | 0.0023 | 0.7472  |                     |               |         |        |        |         |        |
|    | TD        | -0.0001      | -0.0002 | 0.0001 | 0.4381  |                     |               |         |        |        |         |        |

NF: natural frequency, DR: damping ratio, TD: task duration, SD: standard deviation, CI: confident interval, df = 9 (the number of period) \*22 (the number of participant) -4 (the number of estimated variable) = 194, Significance is identified by CI not including 0 and p-value < 0.05, Gray shade means that identified significance exists only in this 830 nm wavelength data. Blue shade means that identified significance exists not only in this 830 nm wavelength data but also in 805nm wavelength data, Red shade means that identified significance exists in all wavelength data.

**Table S19.** Beta ~ State+(1|subject) , 780 nm optical density data statistical results.

| CH | Parameter | Fixed effect |         |        |         | Estimated intercept | Random effect |         |        | Error  |         |       |
|----|-----------|--------------|---------|--------|---------|---------------------|---------------|---------|--------|--------|---------|-------|
|    |           | Effect size  | CI(95%) |        | p-value |                     | SD            | CI(95%) |        | SD     | CI(95%) |       |
|    |           |              | Lower   | Upper  |         |                     |               | Lower   | Upper  |        | Lower   | Upper |
| 1  | State     | 0.0029       | 0.0014  | 0.0044 | 0.0001  | -0.0015             |               |         | 0.0074 | 0.0069 | 0.0080  |       |
| 2  | State     | 0.0016       | 0.0004  | 0.0027 | 0.0070  | -0.0008             |               |         | 0.0057 | 0.0053 | 0.0061  |       |
| 3  | State     | 0.0004       | -0.0017 | 0.0025 | 0.7363  | -0.0002             |               |         | 0.0106 | 0.0099 | 0.0114  |       |
| 4  | State     | 0.0029       | 0.0015  | 0.0043 | 0.0000  | -0.0014             |               |         | 0.0070 | 0.0065 | 0.0075  |       |
| 5  | State     | 0.0012       | -0.0002 | 0.0025 | 0.0913  | -0.0006             |               |         | 0.0069 | 0.0064 | 0.0074  |       |
| 6  | State     | 0.0000       | -0.0018 | 0.0018 | 0.9896  | 0.0000              |               |         | 0.0092 | 0.0086 | 0.0099  |       |
| 7  | State     | 0.0010       | -0.0001 | 0.0021 | 0.0694  | -0.0005             |               |         | 0.0056 | 0.0052 | 0.0060  |       |
| 8  | State     | 0.0000       | -0.0013 | 0.0013 | 0.9636  | 0.0000              |               |         | 0.0067 | 0.0062 | 0.0071  |       |
| 9  | State     | 0.0002       | -0.0011 | 0.0014 | 0.8093  | -0.0001             |               |         | 0.0065 | 0.0061 | 0.0070  |       |
| 10 | State     | 0.0018       | 0.0003  | 0.0033 | 0.0218  | -0.0009             |               |         | 0.0077 | 0.0072 | 0.0083  |       |
| 11 | State     | 0.0017       | 0.0005  | 0.0028 | 0.0039  | -0.0008             |               |         | 0.0058 | 0.0054 | 0.0062  |       |
| 12 | State     | -0.0006      | -0.0019 | 0.0007 | 0.3515  | 0.0003              |               |         | 0.0064 | 0.0059 | 0.0068  |       |
| 13 | State     | 0.0012       | 0.0001  | 0.0023 | 0.0405  | -0.0006             |               |         | 0.0058 | 0.0054 | 0.0062  |       |
| 14 | State     | 0.0010       | -0.0001 | 0.0021 | 0.0813  | -0.0005             |               |         | 0.0055 | 0.0051 | 0.0059  |       |
| 15 | State     | 0.0005       | -0.0007 | 0.0017 | 0.4373  | -0.0002             |               |         | 0.0060 | 0.0056 | 0.0065  |       |
| 16 | State     | 0.0005       | -0.0007 | 0.0016 | 0.4028  | -0.0002             |               |         | 0.0058 | 0.0054 | 0.0062  |       |
| 17 | State     | 0.0009       | -0.0003 | 0.0020 | 0.1276  | -0.0004             |               |         | 0.0057 | 0.0053 | 0.0061  |       |

SD: standard deviation, CI: confident interval, the state consists of the rest state and task state, The value of the rest state is 0, and the value of the task state is 1, df = 18 (the number of period) \*22 (the number of participant) -2 (the number of estimated variable) = 394, Significance is identified by CI not including 0 and p-value < 0.05, Red shade means that identified significance exists in all wavelength data. There is no random effect.

**Table S20.** Beta ~ State+(1|subject) , 805 nm optical density data statistical results.

| CH | Parameter | Fixed effect |         |        |         | Estimated intercept | Random effect |         |        | Error  |         |       |
|----|-----------|--------------|---------|--------|---------|---------------------|---------------|---------|--------|--------|---------|-------|
|    |           | Effect size  | CI(95%) |        | p-value |                     | SD            | CI(95%) |        | SD     | CI(95%) |       |
|    |           |              | Lower   | Upper  |         |                     |               | Lower   | Upper  |        | Lower   | Upper |
| 1  | State     | 0.0044       | 0.0028  | 0.0059 | 0.0000  | -0.0022             |               |         | 0.0079 | 0.0074 | 0.0085  |       |
| 2  | State     | 0.0035       | 0.0023  | 0.0047 | 0.0000  | -0.0017             |               |         | 0.0061 | 0.0057 | 0.0065  |       |
| 3  | State     | 0.0025       | 0.0004  | 0.0046 | 0.0207  | -0.0013             |               |         | 0.0107 | 0.0100 | 0.0114  |       |
| 4  | State     | 0.0046       | 0.0030  | 0.0061 | 0.0000  | -0.0023             |               |         | 0.0078 | 0.0073 | 0.0084  |       |
| 5  | State     | 0.0032       | 0.0017  | 0.0047 | 0.0000  | -0.0015             |               |         | 0.0076 | 0.0071 | 0.0081  |       |
| 6  | State     | 0.0031       | 0.0014  | 0.0049 | 0.0005  | -0.0016             |               |         | 0.0088 | 0.0083 | 0.0095  |       |
| 7  | State     | 0.0015       | 0.0003  | 0.0027 | 0.0138  | -0.0007             |               |         | 0.0060 | 0.0056 | 0.0064  |       |
| 8  | State     | 0.0012       | -0.0002 | 0.0026 | 0.0908  | -0.0006             |               |         | 0.0072 | 0.0067 | 0.0077  |       |
| 9  | State     | 0.0021       | 0.0008  | 0.0035 | 0.0023  | -0.0010             |               |         | 0.0070 | 0.0065 | 0.0075  |       |
| 10 | State     | 0.0022       | 0.0007  | 0.0038 | 0.0055  | -0.0011             |               |         | 0.0080 | 0.0075 | 0.0086  |       |
| 11 | State     | 0.0027       | 0.0015  | 0.0040 | 0.0000  | -0.0013             |               |         | 0.0062 | 0.0058 | 0.0067  |       |
| 12 | State     | 0.0005       | -0.0009 | 0.0019 | 0.4627  | -0.0002             |               |         | 0.0071 | 0.0066 | 0.0076  |       |
| 13 | State     | 0.0029       | 0.0016  | 0.0042 | 0.0000  | -0.0014             |               |         | 0.0065 | 0.0061 | 0.0070  |       |
| 14 | State     | 0.0012       | 0.0001  | 0.0024 | 0.0401  | -0.0006             |               |         | 0.0059 | 0.0055 | 0.0063  |       |
| 15 | State     | 0.0013       | 0.0000  | 0.0027 | 0.0447  | -0.0007             |               |         | 0.0067 | 0.0062 | 0.0071  |       |
| 16 | State     | 0.0017       | 0.0004  | 0.0030 | 0.0109  | -0.0008             |               |         | 0.0066 | 0.0061 | 0.0070  |       |
| 17 | State     | 0.0023       | 0.0011  | 0.0036 | 0.0004  | -0.0011             |               |         | 0.0065 | 0.0060 | 0.0069  |       |

SD: standard deviation, CI: confident interval, the state consists of the rest state and task state, The value of the rest state is 0, and the value of the task state is 1, df = 18 (the number of period) \*22 (the number of participant) -2 (the number of estimated variable) = 394, Significance is identified by CI not including 0 and p-value < 0.05, Blue shade means that identified significance exists not only in this 805 nm wavelength data but also in 830nm wavelength data, Red shade means that identified significance exists in all wavelength data. There is no random effect.

**Table S21.** Beta ~ State+(1|subject) , 830 nm optical density data statistical results.

| CH | Parameter | Fixed effect |         |        |         | Estimated intercept | Random effect |         |        | Error  |         |       |
|----|-----------|--------------|---------|--------|---------|---------------------|---------------|---------|--------|--------|---------|-------|
|    |           | Effect size  | CI(95%) |        | p-value |                     | SD            | CI(95%) |        | SD     | CI(95%) |       |
|    |           |              | Lower   | Upper  |         |                     |               | Lower   | Upper  |        | Lower   | Upper |
| 1  | State     | 0.0051       | 0.0034  | 0.0069 | 0.0000  | -0.0025             |               |         | 0.0088 | 0.0082 | 0.0094  |       |
| 2  | State     | 0.0041       | 0.0028  | 0.0054 | 0.0000  | -0.0020             |               |         | 0.0066 | 0.0062 | 0.0071  |       |
| 3  | State     | 0.0032       | 0.0010  | 0.0053 | 0.0038  | -0.0016             |               |         | 0.0108 | 0.0101 | 0.0116  |       |
| 4  | State     | 0.0052       | 0.0034  | 0.0069 | 0.0000  | -0.0025             |               |         | 0.0088 | 0.0082 | 0.0094  |       |
| 5  | State     | 0.0040       | 0.0024  | 0.0056 | 0.0000  | -0.0020             |               |         | 0.0080 | 0.0075 | 0.0086  |       |
| 6  | State     | 0.0037       | 0.0019  | 0.0055 | 0.0001  | -0.0018             |               |         | 0.0091 | 0.0085 | 0.0098  |       |
| 7  | State     | 0.0019       | 0.0006  | 0.0032 | 0.0043  | -0.0009             |               |         | 0.0066 | 0.0061 | 0.0070  |       |

|    |       |        |         |        |        |         |  |        |        |        |
|----|-------|--------|---------|--------|--------|---------|--|--------|--------|--------|
| 8  | State | 0.0016 | 0.0001  | 0.0031 | 0.0364 | -0.0008 |  | 0.0076 | 0.0071 | 0.0082 |
| 9  | State | 0.0027 | 0.0012  | 0.0042 | 0.0004 | -0.0013 |  | 0.0076 | 0.0071 | 0.0081 |
| 10 | State | 0.0028 | 0.0011  | 0.0044 | 0.0013 | -0.0014 |  | 0.0085 | 0.0079 | 0.0091 |
| 11 | State | 0.0031 | 0.0018  | 0.0045 | 0.0000 | -0.0015 |  | 0.0067 | 0.0063 | 0.0072 |
| 12 | State | 0.0008 | -0.0007 | 0.0024 | 0.2671 | -0.0004 |  | 0.0076 | 0.0071 | 0.0081 |
| 13 | State | 0.0032 | 0.0018  | 0.0046 | 0.0000 | -0.0016 |  | 0.0071 | 0.0066 | 0.0076 |
| 14 | State | 0.0015 | 0.0002  | 0.0028 | 0.0227 | -0.0007 |  | 0.0064 | 0.0060 | 0.0069 |
| 15 | State | 0.0016 | 0.0002  | 0.0030 | 0.0245 | -0.0008 |  | 0.0071 | 0.0066 | 0.0076 |
| 16 | State | 0.0021 | 0.0007  | 0.0034 | 0.0033 | -0.0010 |  | 0.0070 | 0.0065 | 0.0075 |
| 17 | State | 0.0025 | 0.0012  | 0.0039 | 0.0003 | -0.0012 |  | 0.0070 | 0.0065 | 0.0075 |

SD: standard deviation, CI: confident interval, the state consists of the rest state and task state, The value of the rest state is 0, and the value of the task state is 1, df = 18 (the number of period) \*22 (the number of participant) -2 (the number of estimated variable) = 394, Significance is identified by CI not including 0 and p-value < 0.05, Gray shade means that identified significance exists only in this 830 nm wavelength data, Blue shade means that identified significance exists not only in this 830 nm wavelength data but also in 805nm wavelength data, Red shade means that identified significance exists in all wavelength density data. There is no random effect.

**Table S22.** Beta~ Rest duration+ (1|subject) , 780 nm optical density data statistical results.

| CH | Parameter | Fixed effect |         |        |         | Estimated intercept | Random effect |         |        | Error  |         |       |
|----|-----------|--------------|---------|--------|---------|---------------------|---------------|---------|--------|--------|---------|-------|
|    |           | Effect size* | CI(95%) |        | p-value |                     | SD            | CI(95%) |        | SD     | CI(95%) |       |
|    |           |              | Lower*  | Upper* |         |                     |               | Lower   | Upper  |        | Lower   | Upper |
| 1  | RD        | -0.1490      | -0.3590 | 0.0611 | 0.1635  | -0.0001             |               |         | 0.0077 | 0.0070 | 0.0085  |       |
| 2  | RD        | -0.0895      | -0.2517 | 0.0727 | 0.2781  | 0.0000              |               |         | 0.0060 | 0.0054 | 0.0066  |       |
| 3  | RD        | -0.1029      | -0.4290 | 0.2232 | 0.5344  | 0.0007              |               |         | 0.0120 | 0.0109 | 0.0133  |       |
| 4  | RD        | -0.0823      | -0.2824 | 0.1178 | 0.4184  | -0.0007             |               |         | 0.0074 | 0.0067 | 0.0081  |       |
| 5  | RD        | -0.1165      | -0.3056 | 0.0726 | 0.2257  | 0.0005              |               |         | 0.0070 | 0.0063 | 0.0077  |       |
| 6  | RD        | -0.1702      | -0.4536 | 0.1133 | 0.2378  | 0.0015              |               |         | 0.0104 | 0.0095 | 0.0115  |       |
| 7  | RD        | -0.0655      | -0.2265 | 0.0955 | 0.4233  | 0.0001              |               |         | 0.0059 | 0.0054 | 0.0065  |       |
| 8  | RD        | -0.1453      | -0.3248 | 0.0342 | 0.1119  | 0.0013              |               |         | 0.0066 | 0.0060 | 0.0073  |       |
| 9  | RD        | -0.1662      | -0.3503 | 0.0178 | 0.0765  | 0.0014              |               |         | 0.0068 | 0.0061 | 0.0075  |       |
| 10 | RD        | -0.1420      | -0.3795 | 0.0954 | 0.2395  | 0.0004              |               |         | 0.0087 | 0.0079 | 0.0097  |       |
| 11 | RD        | -0.0971      | -0.2559 | 0.0617 | 0.2294  | 0.0000              |               |         | 0.0059 | 0.0053 | 0.0065  |       |
| 12 | RD        | -0.1205      | -0.2947 | 0.0538 | 0.1743  | 0.0014              |               |         | 0.0064 | 0.0058 | 0.0071  |       |
| 13 | RD        | -0.1271      | -0.2913 | 0.0371 | 0.1285  | 0.0006              |               |         | 0.0061 | 0.0055 | 0.0067  |       |
| 14 | RD        | -0.0621      | -0.2204 | 0.0961 | 0.4396  | 0.0001              |               |         | 0.0058 | 0.0053 | 0.0064  |       |
| 15 | RD        | -0.0795      | -0.2474 | 0.0885 | 0.3518  | 0.0005              |               |         | 0.0062 | 0.0056 | 0.0068  |       |
| 16 | RD        | -0.0446      | -0.2065 | 0.1172 | 0.5872  | 0.0002              |               |         | 0.0060 | 0.0054 | 0.0066  |       |
| 17 | RD        | -0.0455      | -0.2059 | 0.1148 | 0.5759  | 0.0000              |               |         | 0.0059 | 0.0054 | 0.0065  |       |

RD: rest duration, \* :  $\times 10^{-3}$ , SD: standard deviation, CI: confident interval, Beta value calculated from the rest state only, df = 9 (the number of period) \*22 (the number of participant) -2 (the number of estimated variable) = 196, Significance is identified by CI not including 0 and p-value < 0.05, There is no random effect.

**Table S23.** Beta~ Rest duration+ (1|subject) , 805 nm optical density data statistical results.

| CH | Parameter | Fixed effect |         |        |         | Estimated intercept | Random effect |         |        | Error  |         |       |
|----|-----------|--------------|---------|--------|---------|---------------------|---------------|---------|--------|--------|---------|-------|
|    |           | Effect size* | CI(95%) |        | p-value |                     | SD            | CI(95%) |        | SD     | CI(95%) |       |
|    |           |              | Lower*  | Upper* |         |                     |               | Lower   | Upper  |        | Lower   | Upper |
| 1  | RD        | -0.1105      | -0.3339 | 0.1129 | 0.3304  | -0.0012             |               |         | 0.0082 | 0.0075 | 0.0091  |       |
| 2  | RD        | -0.0761      | -0.2408 | 0.0886 | 0.3633  | -0.0010             |               |         | 0.0061 | 0.0055 | 0.0067  |       |
| 3  | RD        | -0.1089      | -0.4365 | 0.2188 | 0.5131  | -0.0003             |               |         | 0.0121 | 0.0109 | 0.0133  |       |
| 4  | RD        | -0.0563      | -0.2771 | 0.1645 | 0.6155  | -0.0018             |               |         | 0.0081 | 0.0074 | 0.0090  |       |
| 5  | RD        | -0.1033      | -0.3085 | 0.1019 | 0.3221  | -0.0006             |               |         | 0.0076 | 0.0069 | 0.0083  |       |
| 6  | RD        | -0.1702      | -0.4353 | 0.0949 | 0.2070  | 0.0000              |               |         | 0.0098 | 0.0089 | 0.0108  |       |
| 7  | RD        | -0.0678      | -0.2390 | 0.1034 | 0.4356  | -0.0001             |               |         | 0.0063 | 0.0057 | 0.0070  |       |
| 8  | RD        | -0.1285      | -0.3231 | 0.0662 | 0.1946  | 0.0006              |               |         | 0.0072 | 0.0065 | 0.0079  |       |
| 9  | RD        | -0.1379      | -0.3340 | 0.0582 | 0.1672  | 0.0002              |               |         | 0.0072 | 0.0065 | 0.0080  |       |
| 10 | RD        | -0.1202      | -0.3661 | 0.1257 | 0.3362  | 0.0000              |               |         | 0.0091 | 0.0082 | 0.0100  |       |
| 11 | RD        | -0.0913      | -0.2637 | 0.0811 | 0.2977  | -0.0005             |               |         | 0.0064 | 0.0058 | 0.0070  |       |
| 12 | RD        | -0.1079      | -0.3042 | 0.0883 | 0.2794  | 0.0007              |               |         | 0.0072 | 0.0066 | 0.0080  |       |
| 13 | RD        | -0.1068      | -0.2873 | 0.0737 | 0.2449  | -0.0005             |               |         | 0.0067 | 0.0060 | 0.0073  |       |
| 14 | RD        | -0.0626      | -0.2308 | 0.1055 | 0.4635  | 0.0000              |               |         | 0.0062 | 0.0056 | 0.0068  |       |
| 15 | RD        | -0.0506      | -0.2396 | 0.1383 | 0.5978  | -0.0002             |               |         | 0.0070 | 0.0063 | 0.0077  |       |
| 16 | RD        | -0.0248      | -0.2068 | 0.1572 | 0.7886  | -0.0006             |               |         | 0.0067 | 0.0061 | 0.0074  |       |
| 17 | RD        | -0.0592      | -0.2371 | 0.1187 | 0.5123  | -0.0006             |               |         | 0.0066 | 0.0059 | 0.0072  |       |

RD: rest duration, \* :  $\times 10^{-3}$ , SD: standard deviation, CI: confident interval, Beta value calculated from the rest state only, df = 9 (the number of period) \*22 (the number of participant) -2 (the number of estimated variable) = 196, Significance is identified by CI not including 0 and p-value < 0.05, There is no random effect.



|    |    |         |         |        |        |         |        |        |        |        |        |        |
|----|----|---------|---------|--------|--------|---------|--------|--------|--------|--------|--------|--------|
| 14 | NF | 0.0007  | 0.0003  | 0.0012 | 0.0010 | -0.0013 |        |        |        | 0.0050 | 0.0045 | 0.0055 |
|    | DR | -0.0004 | -0.0022 | 0.0013 | 0.6119 |         |        |        |        |        |        |        |
|    | TD | 0.0000  | -0.0001 | 0.0001 | 0.9852 |         |        |        |        |        |        |        |
| 15 | NF | 0.0010  | 0.0005  | 0.0015 | 0.0001 | -0.0033 |        |        |        | 0.0056 | 0.0051 | 0.0062 |
|    | DR | 0.0005  | -0.0014 | 0.0024 | 0.6139 |         |        |        |        |        |        |        |
|    | TD | 0.0000  | -0.0001 | 0.0002 | 0.9232 |         |        |        |        |        |        |        |
| 16 | NF | 0.0013  | 0.0009  | 0.0018 | 0.0000 | -0.0047 |        |        |        | 0.0051 | 0.0046 | 0.0056 |
|    | DR | 0.0014  | -0.0004 | 0.0031 | 0.1247 |         |        |        |        |        |        |        |
|    | TD | 0.0000  | -0.0002 | 0.0001 | 0.5871 |         |        |        |        |        |        |        |
| 17 | NF | 0.0011  | 0.0007  | 0.0015 | 0.0000 | -0.0036 | 0.0021 | 0.0013 | 0.0033 | 0.0047 | 0.0042 | 0.0052 |
|    | DR | 0.0010  | -0.0006 | 0.0026 | 0.2164 |         |        |        |        |        |        |        |
|    | TD | 0.0000  | -0.0002 | 0.0001 | 0.6128 |         |        |        |        |        |        |        |

NF: natural frequency, DR: damping ratio, TD: task duration, SD: standard deviation, CI: confident interval, df = 9 (the number of period) \*22 (the number of participant) -4 (the number of estimated variable) = 194, Significance is identified by CI not including 0 and p-value < 0.05, Gray shade means that identified significance exists only in this 780 nm optical density data, Blue shade means that identified significance exists not only in this 780 nm wavelength data but also in 805 or 830nm wavelength data, Red shade means that identified significance exists in all wavelength data. Blank in random effect column means there is no random effect.

**Table S26.** Beta ~ Task duration+ $\omega_n + \zeta + (1 | \text{subject})$ , 805 nm optical density data statistical results.

| CH | Parameter | Fixed effect |         |        |         | Estimated intercept | Random effect |         |        |    | Error   |        |        |  |
|----|-----------|--------------|---------|--------|---------|---------------------|---------------|---------|--------|----|---------|--------|--------|--|
|    |           | Effect size  | CI(95%) |        | p-value |                     | SD            | CI(95%) |        | SD | CI(95%) |        |        |  |
|    |           |              | Lower   | Upper  |         |                     |               | Lower   | Upper  |    | Lower   | Upper  |        |  |
| 1  | NF        | 0.0010       | 0.0003  | 0.0016 | 0.0036  | 0.0006              |               |         |        |    | 0.0075  | 0.0068 | 0.0082 |  |
|    | DR        | -0.0011      | -0.0036 | 0.0015 | 0.4125  |                     |               |         |        |    |         |        |        |  |
|    | TD        | 0.0000       | -0.0002 | 0.0002 | 0.7918  |                     |               |         |        |    |         |        |        |  |
| 2  | NF        | 0.0009       | 0.0004  | 0.0014 | 0.0005  | 0.0010              |               |         |        |    | 0.0059  | 0.0053 | 0.0065 |  |
|    | DR        | -0.0015      | -0.0036 | 0.0005 | 0.1328  |                     |               |         |        |    |         |        |        |  |
|    | TD        | 0.0000       | -0.0002 | 0.0001 | 0.5714  |                     |               |         |        |    |         |        |        |  |
| 3  | NF        | 0.0008       | 0.0001  | 0.0015 | 0.0225  | 0.0015              | 0.0042        | 0.0028  | 0.0064 |    | 0.0078  | 0.0070 | 0.0087 |  |
|    | DR        | -0.0024      | -0.0051 | 0.0003 | 0.0815  |                     |               |         |        |    |         |        |        |  |
|    | TD        | 0.0000       | -0.0002 | 0.0002 | 0.8098  |                     |               |         |        |    |         |        |        |  |
| 4  | NF        | 0.0009       | 0.0003  | 0.0016 | 0.0036  | 0.0019              |               |         |        |    | 0.0073  | 0.0066 | 0.0080 |  |
|    | DR        | -0.0016      | -0.0041 | 0.0009 | 0.2145  |                     |               |         |        |    |         |        |        |  |
|    | TD        | -0.0001      | -0.0003 | 0.0001 | 0.4129  |                     |               |         |        |    |         |        |        |  |
| 5  | NF        | 0.0013       | 0.0007  | 0.0019 | 0.0001  | -0.0013             |               |         |        |    | 0.0073  | 0.0066 | 0.0080 |  |
|    | DR        | -0.0008      | -0.0033 | 0.0017 | 0.5451  |                     |               |         |        |    |         |        |        |  |
|    | TD        | 0.0000       | -0.0002 | 0.0002 | 0.8250  |                     |               |         |        |    |         |        |        |  |
| 6  | NF        | 0.0008       | 0.0002  | 0.0014 | 0.0082  | 0.0001              | 0.0033        | 0.0022  | 0.0052 |    | 0.0069  | 0.0062 | 0.0076 |  |
|    | DR        | -0.0014      | -0.0038 | 0.0009 | 0.2353  |                     |               |         |        |    |         |        |        |  |
|    | TD        | 0.0000       | -0.0001 | 0.0002 | 0.6442  |                     |               |         |        |    |         |        |        |  |
| 7  | NF        | 0.0008       | 0.0004  | 0.0013 | 0.0001  | -0.0004             | 0.0025        | 0.0017  | 0.0038 |    | 0.0048  | 0.0044 | 0.0054 |  |
|    | DR        | -0.0011      | -0.0028 | 0.0005 | 0.1753  |                     |               |         |        |    |         |        |        |  |
|    | TD        | 0.0000       | -0.0001 | 0.0001 | 0.8253  |                     |               |         |        |    |         |        |        |  |
| 8  | NF        | 0.0013       | 0.0007  | 0.0019 | 0.0000  | -0.0025             |               |         |        |    | 0.0068  | 0.0062 | 0.0075 |  |
|    | DR        | -0.0009      | -0.0033 | 0.0014 | 0.4307  |                     |               |         |        |    |         |        |        |  |
|    | TD        | 0.0000       | -0.0002 | 0.0002 | 0.7577  |                     |               |         |        |    |         |        |        |  |
| 9  | NF        | 0.0012       | 0.0007  | 0.0017 | 0.0000  | -0.0035             | 0.0027        | 0.0017  | 0.0042 |    | 0.0057  | 0.0051 | 0.0063 |  |
|    | DR        | 0.0006       | -0.0013 | 0.0026 | 0.5287  |                     |               |         |        |    |         |        |        |  |
|    | TD        | 0.0000       | -0.0001 | 0.0002 | 0.6491  |                     |               |         |        |    |         |        |        |  |
| 10 | NF        | 0.0010       | 0.0004  | 0.0016 | 0.0006  | -0.0010             |               |         |        |    | 0.0066  | 0.0059 | 0.0072 |  |
|    | DR        | -0.0010      | -0.0033 | 0.0012 | 0.3720  |                     |               |         |        |    |         |        |        |  |
|    | TD        | 0.0000       | -0.0002 | 0.0002 | 0.8883  |                     |               |         |        |    |         |        |        |  |
| 11 | NF        | 0.0010       | 0.0005  | 0.0015 | 0.0001  | -0.0020             |               |         |        |    | 0.0059  | 0.0053 | 0.0065 |  |
|    | DR        | 0.0005       | -0.0015 | 0.0025 | 0.6241  |                     |               |         |        |    |         |        |        |  |
|    | TD        | 0.0000       | -0.0002 | 0.0001 | 0.8297  |                     |               |         |        |    |         |        |        |  |
| 12 | NF        | 0.0015       | 0.0009  | 0.0020 | 0.0000  | -0.0046             | 0.0027        | 0.0017  | 0.0043 |    | 0.0059  | 0.0054 | 0.0066 |  |
|    | DR        | 0.0005       | -0.0016 | 0.0025 | 0.6608  |                     |               |         |        |    |         |        |        |  |
|    | TD        | 0.0000       | -0.0002 | 0.0002 | 0.8995  |                     |               |         |        |    |         |        |        |  |
| 13 | NF        | 0.0014       | 0.0009  | 0.0019 | 0.0000  | -0.0028             |               |         |        |    | 0.0060  | 0.0054 | 0.0066 |  |
|    | DR        | 0.0004       | -0.0017 | 0.0024 | 0.7303  |                     |               |         |        |    |         |        |        |  |
|    | TD        | 0.0000       | -0.0002 | 0.0001 | 0.7550  |                     |               |         |        |    |         |        |        |  |
| 14 | NF        | 0.0008       | 0.0003  | 0.0013 | 0.0011  | -0.0008             |               |         |        |    | 0.0055  | 0.0049 | 0.0060 |  |
|    | DR        | -0.0008      | -0.0027 | 0.0011 | 0.3882  |                     |               |         |        |    |         |        |        |  |
|    | TD        | 0.0000       | -0.0002 | 0.0001 | 0.8353  |                     |               |         |        |    |         |        |        |  |
| 15 | NF        | 0.0013       | 0.0007  | 0.0018 | 0.0000  | -0.0028             |               |         |        |    | 0.0060  | 0.0054 | 0.0066 |  |
|    | DR        | 0.0002       | -0.0019 | 0.0022 | 0.8840  |                     |               |         |        |    |         |        |        |  |
|    | TD        | -0.0001      | -0.0002 | 0.0001 | 0.5485  |                     |               |         |        |    |         |        |        |  |
| 16 | NF        | 0.0016       | 0.0011  | 0.0021 | 0.0000  | -0.0042             |               |         |        |    | 0.0059  | 0.0053 | 0.0065 |  |
|    | DR        | 0.0012       | -0.0009 | 0.0032 | 0.2581  |                     |               |         |        |    |         |        |        |  |
|    | TD        | -0.0001      | -0.0003 | 0.0001 | 0.2491  |                     |               |         |        |    |         |        |        |  |
| 17 | NF        | 0.0014       | 0.0009  | 0.0019 | 0.0000  | -0.0033             |               |         |        |    | 0.0060  | 0.0054 | 0.0066 |  |
|    | DR        | 0.0008       | -0.0012 | 0.0029 | 0.4170  |                     |               |         |        |    |         |        |        |  |
|    | TD        | -0.0001      | -0.0002 | 0.0001 | 0.4527  |                     |               |         |        |    |         |        |        |  |

NF: natural frequency, DR: damping ratio, TD: task duration, SD: standard deviation, CI: confident interval, df = 9 (the number of period) \*22 (the

number of participant) -4 (the number of estimated variable) = 194, Significance is identified by CI not including 0 and p-value < 0.05, Gray shade means that identified significance exists only in this 805 nm wavelength data, Blue shade means that identified significance exists not only in this 805 nm wavelength data but also in 830nm wavelength data, Red shade means that identified significance exists in all wavelength data. Blank in random effect column means there is no random effect.

**Table S27.** Beta ~ Task duration+ $\omega_n + \zeta + (1|\text{subject})$ , 830 nm optical density data statistical results.

| CH | Parameter | Fixed effect |         |        |         | Estimated intercept | Random effect |         |        | Error  |         |        |
|----|-----------|--------------|---------|--------|---------|---------------------|---------------|---------|--------|--------|---------|--------|
|    |           | Effect size  | CI(95%) |        | p-value |                     | SD            | CI(95%) |        | SD     | CI(95%) |        |
|    |           |              | Lower   | Upper  |         |                     |               | Lower   | Upper  |        | Lower   | Upper  |
| 1  | NF        | 0.0011       | 0.0004  | 0.0018 | 0.0027  | 0.0009              |               |         |        | 0.0083 | 0.0075  | 0.0092 |
|    | DR        | -0.0012      | -0.0040 | 0.0017 | 0.4185  |                     |               |         |        |        |         |        |
|    | TD        | 0.0000       | -0.0003 | 0.0002 | 0.6725  |                     |               |         |        |        |         |        |
| 2  | NF        | 0.0011       | 0.0006  | 0.0017 | 0.0001  | 0.0007              |               |         |        | 0.0064 | 0.0058  | 0.0070 |
|    | DR        | -0.0014      | -0.0036 | 0.0007 | 0.1934  |                     |               |         |        |        |         |        |
|    | TD        | -0.0001      | -0.0002 | 0.0001 | 0.5622  |                     |               |         |        |        |         |        |
| 3  | NF        | 0.0009       | 0.0002  | 0.0016 | 0.0131  | 0.0017              | 0.0041        | 0.0027  | 0.0063 | 0.0081 | 0.0073  | 0.0090 |
|    | DR        | -0.0025      | -0.0053 | 0.0003 | 0.0765  |                     |               |         |        |        |         |        |
|    | TD        | 0.0000       | -0.0003 | 0.0002 | 0.7703  |                     |               |         |        |        |         |        |
| 4  | NF        | 0.0010       | 0.0003  | 0.0017 | 0.0053  | 0.0025              |               |         |        | 0.0082 | 0.0075  | 0.0091 |
|    | DR        | -0.0019      | -0.0048 | 0.0009 | 0.1812  |                     |               |         |        |        |         |        |
|    | TD        | -0.0001      | -0.0003 | 0.0001 | 0.3859  |                     |               |         |        |        |         |        |
| 5  | NF        | 0.0015       | 0.0008  | 0.0022 | 0.0000  | -0.0007             |               |         |        | 0.0077 | 0.0070  | 0.0085 |
|    | DR        | -0.0012      | -0.0039 | 0.0014 | 0.3654  |                     |               |         |        |        |         |        |
|    | TD        | 0.0000       | -0.0003 | 0.0002 | 0.6711  |                     |               |         |        |        |         |        |
| 6  | NF        | 0.0010       | 0.0004  | 0.0016 | 0.0024  | 0.0003              | 0.0033        | 0.0021  | 0.0052 | 0.0072 | 0.0065  | 0.0080 |
|    | DR        | -0.0016      | -0.0040 | 0.0009 | 0.2112  |                     |               |         |        |        |         |        |
|    | TD        | 0.0000       | -0.0002 | 0.0002 | 0.8439  |                     |               |         |        |        |         |        |
| 7  | NF        | 0.0009       | 0.0005  | 0.0014 | 0.0001  | 0.0000              | 0.0026        | 0.0017  | 0.0040 | 0.0054 | 0.0049  | 0.0060 |
|    | DR        | -0.0016      | -0.0034 | 0.0003 | 0.0989  |                     |               |         |        |        |         |        |
|    | TD        | 0.0000       | -0.0002 | 0.0001 | 0.6286  |                     |               |         |        |        |         |        |
| 8  | NF        | 0.0014       | 0.0007  | 0.0020 | 0.0000  | -0.0022             |               |         |        | 0.0073 | 0.0066  | 0.0081 |
|    | DR        | -0.0011      | -0.0036 | 0.0014 | 0.3748  |                     |               |         |        |        |         |        |
|    | TD        | 0.0000       | -0.0002 | 0.0002 | 0.9367  |                     |               |         |        |        |         |        |
| 9  | NF        | 0.0013       | 0.0008  | 0.0019 | 0.0000  | -0.0033             | 0.0028        | 0.0018  | 0.0045 | 0.0063 | 0.0057  | 0.0070 |
|    | DR        | 0.0006       | -0.0016 | 0.0027 | 0.6092  |                     |               |         |        |        |         |        |
|    | TD        | 0.0000       | -0.0002 | 0.0002 | 0.8724  |                     |               |         |        |        |         |        |
| 10 | NF        | 0.0012       | 0.0006  | 0.0018 | 0.0002  | -0.0007             |               |         |        | 0.0072 | 0.0065  | 0.0080 |
|    | DR        | -0.0014      | -0.0039 | 0.0011 | 0.2608  |                     |               |         |        |        |         |        |
|    | TD        | 0.0000       | -0.0002 | 0.0002 | 0.9089  |                     |               |         |        |        |         |        |
| 11 | NF        | 0.0011       | 0.0005  | 0.0016 | 0.0001  | -0.0017             |               |         |        | 0.0063 | 0.0057  | 0.0070 |
|    | DR        | 0.0004       | -0.0018 | 0.0025 | 0.7447  |                     |               |         |        |        |         |        |
|    | TD        | 0.0000       | -0.0002 | 0.0001 | 0.7153  |                     |               |         |        |        |         |        |
| 12 | NF        | 0.0016       | 0.0010  | 0.0021 | 0.0000  | -0.0046             | 0.0029        | 0.0018  | 0.0046 | 0.0064 | 0.0058  | 0.0071 |
|    | DR        | 0.0004       | -0.0017 | 0.0026 | 0.6864  |                     |               |         |        |        |         |        |
|    | TD        | 0.0000       | -0.0002 | 0.0002 | 0.8788  |                     |               |         |        |        |         |        |
| 13 | NF        | 0.0015       | 0.0009  | 0.0020 | 0.0000  | -0.0025             |               |         |        | 0.0066 | 0.0060  | 0.0073 |
|    | DR        | 0.0002       | -0.0021 | 0.0025 | 0.8605  |                     |               |         |        |        |         |        |
|    | TD        | 0.0000       | -0.0002 | 0.0001 | 0.6013  |                     |               |         |        |        |         |        |
| 14 | NF        | 0.0010       | 0.0005  | 0.0015 | 0.0003  | -0.0006             |               |         |        | 0.0060 | 0.0054  | 0.0066 |
|    | DR        | -0.0012      | -0.0032 | 0.0009 | 0.2669  |                     |               |         |        |        |         |        |
|    | TD        | 0.0000       | -0.0002 | 0.0001 | 0.6112  |                     |               |         |        |        |         |        |
| 15 | NF        | 0.0014       | 0.0008  | 0.0019 | 0.0000  | -0.0028             |               |         |        | 0.0064 | 0.0058  | 0.0071 |
|    | DR        | 0.0001       | -0.0021 | 0.0023 | 0.9067  |                     |               |         |        |        |         |        |
|    | TD        | -0.0001      | -0.0002 | 0.0001 | 0.5328  |                     |               |         |        |        |         |        |
| 16 | NF        | 0.0017       | 0.0012  | 0.0023 | 0.0000  | -0.0040             |               |         |        | 0.0062 | 0.0057  | 0.0069 |
|    | DR        | 0.0010       | -0.0012 | 0.0031 | 0.3692  |                     |               |         |        |        |         |        |
|    | TD        | -0.0001      | -0.0003 | 0.0001 | 0.2031  |                     |               |         |        |        |         |        |
| 17 | NF        | 0.0015       | 0.0009  | 0.0021 | 0.0000  | -0.0029             |               |         |        | 0.0066 | 0.0059  | 0.0072 |
|    | DR        | 0.0004       | -0.0019 | 0.0026 | 0.7469  |                     |               |         |        |        |         |        |
|    | TD        | -0.0001      | -0.0003 | 0.0001 | 0.4383  |                     |               |         |        |        |         |        |

NF: natural frequency, DR: damping ratio, TD: task duration, SD: standard deviation, CI: confident interval, df = 9 (the number of period) \*22 (the number of participant) -4 (the number of estimated variable) = 194, Significance is identified by CI not including 0 and p-value < 0.05, Gray shade means that identified significance exists only in this 830 nm wavelength data. Blue shade means that identified significance exists not only in this 830 nm wavelength data but also in 805nm wavelength data, Red shade means that identified significance exists in all wavelength data.

**Table S28.** Mechanical impedance conditions.

|                   |            | Damping ratio |     |    |     |
|-------------------|------------|---------------|-----|----|-----|
|                   |            | $\zeta$       | 0.5 | 1  | 1.5 |
| Natural frequency | $\omega_n$ |               |     |    |     |
|                   | 1          | #1            | #2  | #3 |     |
|                   | 3          | #4            | #5  | #6 |     |
|                   | 5          | #6            | #7  | #9 |     |

**Table S29.** Mechanical impedance condition orders of participants.

| Participant | Mechanical impedance condition order |   |   |   |   |   |   |   |   |
|-------------|--------------------------------------|---|---|---|---|---|---|---|---|
| kmj(M)      | 3                                    | 8 | 7 | 2 | 1 | 6 | 5 | 9 | 4 |
| wjh(F)      | 3                                    | 1 | 5 | 2 | 7 | 9 | 8 | 4 | 6 |
| ksj_1(M)    | 1                                    | 9 | 8 | 3 | 5 | 4 | 7 | 6 | 2 |
| kjs(M)      | 2                                    | 9 | 5 | 8 | 4 | 3 | 6 | 1 | 7 |
| lcj(M)      | 1                                    | 3 | 7 | 4 | 6 | 8 | 2 | 9 | 5 |
| cgy(F)      | 6                                    | 8 | 4 | 7 | 5 | 2 | 3 | 9 | 1 |
| cpj(M)      | 6                                    | 3 | 1 | 5 | 9 | 4 | 8 | 7 | 2 |
| lkj(F)      | 2                                    | 8 | 1 | 6 | 3 | 9 | 5 | 7 | 4 |
| lje(F)      | 5                                    | 2 | 4 | 7 | 3 | 9 | 8 | 6 | 1 |
| jnc(M)      | 3                                    | 1 | 6 | 7 | 2 | 4 | 9 | 5 | 8 |
| sjh(M)      | 4                                    | 1 | 3 | 5 | 2 | 8 | 9 | 7 | 6 |
| jsj(F)      | 6                                    | 7 | 3 | 1 | 2 | 5 | 9 | 4 | 8 |
| hjl(M)      | 2                                    | 1 | 4 | 3 | 9 | 8 | 7 | 5 | 6 |
| kjh(M)      | 6                                    | 8 | 1 | 5 | 9 | 3 | 2 | 4 | 7 |
| cjh(M)      | 4                                    | 7 | 6 | 2 | 9 | 8 | 5 | 1 | 3 |
| nse(M)      | 5                                    | 2 | 9 | 4 | 8 | 1 | 6 | 7 | 3 |
| sey(F)      | 7                                    | 2 | 9 | 5 | 3 | 1 | 6 | 8 | 4 |
| kjc(M)      | 1                                    | 6 | 5 | 3 | 4 | 8 | 9 | 2 | 7 |
| hmc(M)      | 6                                    | 5 | 3 | 1 | 7 | 8 | 9 | 4 | 2 |
| ksj_2(M)    | 2                                    | 9 | 3 | 5 | 1 | 8 | 7 | 6 | 4 |
| ces(F)      | 3                                    | 9 | 4 | 7 | 2 | 5 | 1 | 8 | 6 |
| sah(F)      | 7                                    | 6 | 2 | 3 | 1 | 9 | 4 | 5 | 8 |

M: male, F: female, ksj\_1 and ksj\_2 are different participants. Mechanical impedance conditions were conducted at the task period.



**Table S30.** Summary of results of the previous study.

| <div>Neuron group</div> <div>Motion</div> | Group A                                | Group B                                |
|-------------------------------------------|----------------------------------------|----------------------------------------|
| Elbow extension torque                    | Discharge rate decreases.<br>(Case 1.) | Discharge rate increases.<br>(Case 2.) |
| Elbow flexion torque                      | Discharge rate increases.<br>(Case 3.) | Discharge rate decreases.<br>(Case 4.) |
